# Supplementary material for: Systematic and Evolutionary Insights Derived from mtDNA COI Barcode Diversity in the Decapoda (Crustacea: Malacostraca)
Source: PubMed Central journal article supplement (PMC3093375; doi:10.1371/journal.pone.0019449), 2011-05-12
Supplement: pone.0019449.s001.pdf [file pone.0019449.s001.pdf]

# BOLD TaxonID Tree

Project : SEARCH: Processids(1906)  
Date : 7-November-2010  
Data Type : Nucleotide  
Distance Model : Kimura 2 Parameter  
Marker : COI-5P  
Codon Positions : 1st, 2nd, 3rd  
Labels : SampleID, Family,  
Filters : Length > 200

Sequence Count : 1906  
Species count : 603  
Genus count : 225  
Family count : 71  
Unidentified : 0

Pasiphaea sivado|FCFOPC041-16|Pasiphaeidae  
 Pasiphaea sivado|FCFOPC041-15|Pasiphaeidae  
 Pasiphaea sivado|FCFOPC041-18|Pasiphaeidae  
 Pasiphaea sivado|FCFOPC041-17|Pasiphaeidae  
 Pasiphaea sivado|FCFOPC041-19|Pasiphaeidae  
 Pasiphaea hoplocerca|JSDPX63-01|Pasiphaeidae  
 Pasiphaea pacifica|FC-TAC144A|Pasiphaeidae  
 Pasiphaea pacifica|FC-TAC29A|Pasiphaeidae  
 Pasiphaea pacifica|FC-TAC29C|Pasiphaeidae  
 Pasiphaea pacifica|FC-TAC29B|Pasiphaeidae  
 Pasiphaea pacifica|FC-TAC29D|Pasiphaeidae  
 Pasiphaea multidentata|TE-004T1-20-14|Pasiphaeidae  
 Pasiphaea multidentata|TE-004T141-160-04|Pasiphaeidae  
 Pasiphaea multidentata|JSDUKdeep\_26|Pasiphaeidae  
 Pasiphaea multidentata|JSDUKdeep\_27|Pasiphaeidae  
 Pasiphaea multidentata|TE-004T81-100-02|Pasiphaeidae  
 Pasiphaea tarda|FC-TAE22B|Pasiphaeidae  
 Pasiphaea tarda|FC-TAE13A|Pasiphaeidae  
 Pasiphaea tarda|FC-TAE13B|Pasiphaeidae  
 Pasiphaea tarda|FC-TAE22D|Pasiphaeidae  
 Pasiphaea tarda|JSDUKdeep\_11|Pasiphaeidae  
 Pasiphaea tarda|JSDUKdeep\_12|Pasiphaeidae  
 Pasiphaea tarda|JSDUKdeep\_13|Pasiphaeidae  
 Corystes cassivelaunus|JSDUK23|Corystidae  
 Corystes cassivelaunus|JSDUK22|Corystidae  
 Corystes cassivelaunus|JSDUK24|Corystidae  
 Pseudocarcinus gigas|NC\_006891|Menippidae  
 Pseudocarcinus gigas|AY562127|Menippidae  
 Callinectes arcuatus|AY465911|Portunidae  
 Callinectes arcuatus|AY465913|Portunidae  
 Callinectes bellicosus|AY465907|Portunidae  
 Callinectes bellicosus|AY465909|Portunidae  
 Callinectes sapidus|NC\_006281|Portunidae  
 Callinectes sapidus|AY363392|Portunidae  
 Callinectes sapidus|AY465915|Portunidae  
 Callinectes sapidus|AY682073|Portunidae  
 Callinectes sapidus|AY682077|Portunidae  
 Callinectes sapidus|AY682075|Portunidae  
 Callinectes sapidus|AY682074|Portunidae  
 Callinectes sapidus|AY682072|Portunidae  
 Callinectes sapidus|AY682076|Portunidae  
 Callinectes sapidus|AY682078|Portunidae  
 Portunus sanguinolentus|EU284144|Portunidae  
 Portunus pelagicus|FJ812293|Portunidae  
 Portunus trituberculatus|AB093006|Portunidae  
 Portunus trituberculatus|NC\_005037|Portunidae  
 Scylla olivacea|FJ827760|Portunidae  
 Scylla olivacea|NC\_012569|Portunidae  
 Scylla paramamosain|FJ827761|Portunidae  
 Scylla paramamosain|NC\_012572|Portunidae  
 Scylla serrata|FJ827758|Portunidae  
 Scylla serrata|NC\_012565|Portunidae  
 Scylla tranquebarica|FJ827759|Portunidae  
 Scylla tranquebarica|NC\_012567|Portunidae  
 Calappa granulata|JSDAz218|Calappidae  
 Xantho hydrophilus|JSDAz109|Xanthidae  
 Xantho hydrophilus|JSDAz17|Xanthidae  
 Xantho hydrophilus|JSDAz23|Xanthidae  
 Xantho hydrophilus|JSDAz26|Xanthidae  
 Xantho hydrophilus|JSDAz32|Xanthidae  
 Xantho hydrophilus|JSDAz80|Xanthidae  
 Xantho hydrophilus|JSDAz245|Xanthidae  
 Xantho hydrophilus|JSDAz152|Xanthidae  
 Xantho hydrophilus|JSDAz34|Xanthidae  
 Xantho hydrophilus|JSDAz81|Xanthidae  
 Xantho pilipes|JSDUK188|Xanthidae  
 Xantho pilipes|JSDUK186|Xanthidae  
 Xantho pilipes|JSDUK187|Xanthidae  
 Xantho pilipes|DQ458795|Xanthidae  
 Acanthonyx lunulatus|JSDMe59|Epialtidae  
 Acanthonyx lunulatus|JSDMe61|Epialtidae  
 Eriphia verrucosa|JSDAz14|Eriphiidae  
 Eriphia verrucosa|JSDAz15|Eriphiidae  
 Eriphia verrucosa|JSDAz12|Eriphiidae  
 Eriphia verrucosa|JSDAz31|Eriphiidae  
 Eriphia verrucosa|JSDAz13|Eriphiidae  
 Eriphia verrucosa|JSDAz89|Eriphiidae  
 Eriphia verrucosa|JSDAz90|Eriphiidae  
 Eriphia verrucosa|JSDAz92|Eriphiidae  
 Homalaspis plana|FJ155383|Platyxanthidae  
 Loxorhynchus crispatus|EU682850|Epialtidae  
 Loxorhynchus crispatus|EU682851|Epialtidae  
 Herbstia condyliata|EU682845|Epialtidae  
 Herbstia condyliata|JSDAz87|Epialtidae  
 Herbstia condyliata|JSDAz88|Epialtidae  
 Libinia dubia|EU682846|Epialtidae  
 Libinia dubia|EU682847|Epialtidae  
 Libinia emarginata|EU682848|Epialtidae  
 Libinia emarginata|EU682849|Epialtidae  
 Pugettia gracilis|EU682862|Epialtidae  
 Pugettia gracilis|EU682863|Epialtidae  
 Pugettia gracilis|EU682864|Epialtidae  
 Pugettia quadridens|EU682866|Epialtidae  
 Pugettia quadridens|EU682867|Epialtidae  
 Pugettia dalli|EU682860|Epialtidae

Pugettia quadridens|EU682866|Epialtidae  
 Pugettia quadridens|EU682867|Epialtidae  
 Pugettia dalli|EU682860|Epialtidae  
 Pugettia richii|EU682870|Epialtidae  
 Pugettia richii|EU682871|Epialtidae  
 Chorilia longipes|FC-ZGE18A|Epialtidae  
 Chorilia longipes|FC-ZGE124|Epialtidae  
 Chorilia longipes|FC-ZGE48|Epialtidae  
 Scyra acutifrons|EU682852|Epialtidae  
 Scyra acutifrons|EU682853|Epialtidae  
 Taliepus dentatus|EU682872|Epialtidae  
 Acanthonyx petiverii|EU682854|Epialtidae  
 Acanthonyx petiverii|EU682855|Epialtidae  
 Taliepus nuttallii|EU682873|Epialtidae  
 Microphrys bicornutus|EU682843|Majidae  
 Mithraculus sculptus|EU682841|Majidae  
 Tiarina cornigera|EU682837|Majidae  
 Leptomithrax sternocostulatus|FJ812292|Majidae  
 Tiarina spinigera|EU682838|Majidae  
 Carcinus aestuarii|AY616445|Carcinidae  
 Carcinus maenas|AY616441|Carcinidae  
 Carcinus maenas|JSDN01|Carcinidae  
 Carcinus maenas|JSDN03|Carcinidae  
 Carcinus maenas|DQ523685|Carcinidae  
 Carcinus maenas|L174AR1-09|Carcinidae  
 Carcinus maenas|L180AR1-01|Carcinidae  
 Carcinus maenas|JSDN02|Carcinidae  
 Carcinus maenas|JSDUK19|Carcinidae  
 Carcinus maenas|DQ523683|Carcinidae  
 Carcinus maenas|DQ523686|Carcinidae  
 Liocarcinus maculatus|FJ174949|Carcinidae  
 Bathynectes maravigna|FCDPH11-339D1|Macropipidae  
 Bathynectes maravigna|FCDPH12-388Gr67|Macropipidae  
 Bathynectes maravigna|FCDPH12-388Gr68|Macropipidae  
 Bathynectes maravigna|FCDPHM2\_109|Macropipidae  
 Bathynectes maravigna|JSDUKdeep\_47|Macropipidae  
 Bathynectes maravigna|JSDUKdeep\_46|Macropipidae  
 Bathynectes maravigna|FCFOPC041-22|Macropipidae  
 Bathynectes maravigna|FCFOPC041-20|Macropipidae  
 Bathynectes maravigna|JSDUKdeep\_48|Macropipidae  
 Chaceon affinis|AB290212|Geryonidae  
 Geryon longipes|JSDMe83|Geryonidae  
 Geryon longipes|JSDPX44-011|Geryonidae  
 Geryon longipes|JSDPX44-012|Geryonidae  
 Geryon longipes|JSDMe82|Geryonidae  
 Geryon longipes|FCFOPC052-09|Geryonidae  
 Geryon longipes|FCFOPC052-07|Geryonidae  
 Geryon longipes|FCFOPC052-06|Geryonidae  
 Geryon longipes|JSDUKdeep\_31|Geryonidae  
 Geryon longipes|JSDUKdeep\_32|Geryonidae  
 Geryon longipes|JSDUKdeep\_33|Geryonidae  
 Necora puber|FJ755628|Macropipidae  
 Necora puber|FJ755635|Macropipidae  
 Necora puber|FJ755630|Macropipidae  
 Necora puber|FJ755631|Macropipidae  
 Necora puber|FJ755629|Macropipidae  
 Necora puber|FJ755638|Macropipidae  
 Necora puber|FJ755621|Macropipidae  
 Necora puber|FJ755633|Macropipidae  
 Necora puber|JSDPX1-01|Macropipidae  
 Necora puber|DQ480362|Macropipidae  
 Macropipus tuberculatus|JSDMe09|Macropipidae  
 Macropipus tuberculatus|FCFOP42-23|Macropipidae  
 Macropipus tuberculatus|JSDMe41|Macropipidae  
 Macropipus tuberculatus|JSDMe45|Macropipidae  
 Macropipus tuberculatus|FCFOPC045-07|Macropipidae  
 Macropipus tuberculatus|JSDMe44|Macropipidae  
 Macropipus tuberculatus|JSDMe42|Macropipidae  
 Macropipus tuberculatus|JSDMe43|Macropipidae  
 Macropipus tuberculatus|JSDPX9-01|Macropipidae  
 Liocarcinus depurator|JSDMe01|Carcinidae  
 Liocarcinus depurator|JSDMe02|Carcinidae  
 Liocarcinus depurator|JSDUK53|Carcinidae  
 Liocarcinus depurator|JSDUK51|Carcinidae  
 Liocarcinus depurator|JSDUK52|Carcinidae  
 Liocarcinus depurator|FCDOPB077-07|Carcinidae  
 Liocarcinus depurator|FCFOPC041-23|Carcinidae  
 Liocarcinus depurator|FCFOPC041-24|Carcinidae  
 Liocarcinus depurator|FJ174948|Carcinidae  
 Liocarcinus depurator|DQ480363|Carcinidae  
 Polybius henslowii|FCDOPB083-11|Carcinidae  
 Polybius henslowii|FCDOPB083-12|Carcinidae  
 Polybius henslowii|FCDOPB083-13|Carcinidae  
 Polybius henslowii|FCDOPB083-10|Carcinidae  
 Polybius henslowii|FCDOPB083-14|Carcinidae  
 Polybius henslowii|FCFOPC041-01|Carcinidae  
 Polybius henslowii|JSDUK103|Carcinidae  
 Polybius henslowii|JSDUK102|Carcinidae  
 Polybius henslowii|JSDUK74|Carcinidae  
 Polybius henslowii|JSDUK78|Carcinidae  
 Menaethius monoceros|EU682857|Epialtidae  
 Podochela hemphillii|EU682831|Inachidae  
 Charybdis acuta|EU284143|Portunidae  
 Charybdis japonica|EU586120|Portunidae  
 Charybdis feriatius|EU284140|Portunidae  
 Charybdis vadorum|EU284141|Portunidae  
 Ranina ranina|AF346400|Raninidae  
 Monodaeus couchii|FCDPH14-528Gr8|Xanthidae  
 Monodaeus couchii|FCDPH14-528Gr9|Xanthidae

*Ranina ranina*|AF346400|*Raninidae*  
*Monodaeus couchii*|FCDPH14-528Gr8|*Xanthidae*  
*Monodaeus couchii*|FCDPH14-566Gr13|*Xanthidae*  
*Monodaeus couchii*|FCDPH14-528Gr75|*Xanthidae*  
*Monodaeus couchii*|JSDPX24-01|*Xanthidae*  
*Monodaeus couchii*|FCDPH14-528Gr79|*Xanthidae*  
*Monodaeus couchii*|FCDPH14-551D81|*Xanthidae*  
*Monodaeus couchii*|FCDPH14-559B83|*Xanthidae*  
*Monodaeus couchii*|FCDPHM21Bx\_110|*Xanthidae*  
*Monodaeus couchii*|FCDPHMSM242\_98|*Xanthidae*  
*Monodaeus couchii*|JSDPX24-02|*Xanthidae*  
*Chionoecetes angulatus*|FC-ZAE15A|*Oregoniidae*  
*Chionoecetes angulatus*|FC-ZAE15B|*Oregoniidae*  
*Chionoecetes opilio*|EU266370|*Oregoniidae*  
*Chionoecetes opilio*|GSL31-01|*Oregoniidae*  
*Chionoecetes opilio*|BSM08-L03|*Oregoniidae*  
*Chionoecetes opilio*|EU682832|*Oregoniidae*  
*Chionoecetes opilio*|EU682833|*Oregoniidae*  
*Chionoecetes opilio*|BSM08-L01|*Oregoniidae*  
*Chionoecetes opilio*|BSM08-L02|*Oregoniidae*  
*Chionoecetes opilio*|CO01CN0706|*Oregoniidae*  
*Chionoecetes opilio*|CO02CN0706|*Oregoniidae*  
*Chionoecetes bairdi*|AB211158|*Oregoniidae*  
*Chionoecetes bairdi*|AB211157|*Oregoniidae*  
*Chionoecetes bairdi*|FC-ZAF34|*Oregoniidae*  
*Chionoecetes bairdi*|AB211155|*Oregoniidae*  
*Chionoecetes bairdi*|FC-ZAF166|*Oregoniidae*  
*Chionoecetes bairdi*|FC-ZAF29|*Oregoniidae*  
*Chionoecetes bairdi*|AB211156|*Oregoniidae*  
*Chionoecetes bairdi*|AB211159|*Oregoniidae*  
*Chionoecetes tanneri*|FC-ZAG11A|*Oregoniidae*  
*Chionoecetes tanneri*|FC-ZAG11B|*Oregoniidae*  
*Hyas araneus*|JSDSv08|*Oregoniidae*  
*Hyas araneus*|GSL31-18|*Oregoniidae*  
*Hyas araneus*|GSL31-19|*Oregoniidae*  
*Hyas araneus*|HAR02CN0806|*Oregoniidae*  
*Hyas araneus*|TE-004T196-01|*Oregoniidae*  
*Hyas araneus*|HAR01CN0806|*Oregoniidae*  
*Hyas araneus*|JSDSv07|*Oregoniidae*  
*Hyas araneus*|EU682834|*Oregoniidae*  
*Hyas araneus*|BSM07T1-24|*Oregoniidae*  
*Hyas araneus*|BSM07T1-29|*Oregoniidae*  
*Hyas coarctatus*|JSDUK176|*Oregoniidae*  
*Hyas coarctatus*|HC01CN0806|*Oregoniidae*  
*Hyas coarctatus*|HC02CN0806|*Oregoniidae*  
*Hyas coarctatus*|BSM07T9-01|*Oregoniidae*  
*Hyas coarctatus*|GSL31-23|*Oregoniidae*  
*Hyas coarctatus*|GSL31-21|*Oregoniidae*  
*Hyas coarctatus*|BSM07T1-28|*Oregoniidae*  
*Hyas coarctatus*|BSM07T9-02|*Oregoniidae*  
*Hyas lyratus*|FC-ZBA23|*Oregoniidae*  
*Macroregonia macrochira*|AB478047|*Oregoniidae*  
*Macroregonia macrochira*|AB478050|*Oregoniidae*  
*Macroregonia macrochira*|AB478065|*Oregoniidae*  
*Macroregonia macrochira*|AB478070|*Oregoniidae*  
*Macroregonia macrochira*|AB478071|*Oregoniidae*  
*Macroregonia macrochira*|AB478051|*Oregoniidae*  
*Macroregonia macrochira*|AB478048|*Oregoniidae*  
*Macroregonia macrochira*|AB478046|*Oregoniidae*  
*Macroregonia macrochira*|AB478061|*Oregoniidae*  
*Macroregonia macrochira*|AB478074|*Oregoniidae*  
*Oregonia gracilis*|EU682836|*Oregoniidae*  
*Atelecyclus rotundatus*|JSDUK01|*Atelecyclidae*  
*Atelecyclus rotundatus*|JSDPX22-01|*Atelecyclidae*  
*Atelecyclus rotundatus*|FCDOPB077-04|*Atelecyclidae*  
*Atelecyclus rotundatus*|JSDUK02|*Atelecyclidae*  
*Cancer irroratus*|BSM07T1-26|*Cancriidae*  
*Cancer irroratus*|GSL31-09|*Cancriidae*  
*Cancer irroratus*|GSL31-20|*Cancriidae*  
*Cancer irroratus*|L195AR2-01|*Cancriidae*  
*Cancer irroratus*|L210AR4-01|*Cancriidae*  
*Cancer irroratus*|CI01MD0204|*Cancriidae*  
*Cancer irroratus*|CI02MD0204|*Cancriidae*  
*Cancer irroratus*|CI04MD0306|*Cancriidae*  
*Cancer magister*|FC-XKG73D|*Cancriidae*  
*Cancer magister*|FC-XKG73E|*Cancriidae*  
*Cancer bellianus*|JSDPX44-10|*Cancriidae*  
*Cancer pagurus*|JSDUK10|*Cancriidae*  
*Cancer pagurus*|JSDUK11|*Cancriidae*  
*Cancer porteri*|FJ155371|*Cancriidae*  
*Cancer productus*|FC-XLA|*Cancriidae*  
*Cancer productus*|FC-XLA51|*Cancriidae*  
*Cancer plebejus*|FJ155376|*Cancriidae*  
*Cancer plebejus*|FJ155375|*Cancriidae*  
*Cancer plebejus*|FJ155377|*Cancriidae*  
*Metacarcinus edwardsii*|FJ155372|*Cancriidae*  
*Metacarcinus edwardsii*|FJ155373|*Cancriidae*  
*Metacarcinus edwardsii*|FJ155374|*Cancriidae*  
*Cancer oregonensis*|FC-XKI\_48|*Cancriidae*  
*Cancer oregonensis*|FC-XKI|*Cancriidae*  
*Romaleon polyodon*|FJ155378|*Cancriidae*  
*Romaleon polyodon*|FJ155379|*Cancriidae*  
*Romaleon polyodon*|FJ155380|*Cancriidae*  
*Romaleon polyodon*|FJ155381|*Cancriidae*  
*Romaleon polyodon*|FJ155382|*Cancriidae*  
*Dyspanopeus sayi*|L154AR1-06|*Panopeidae*  
*Dyspanopeus sayi*|L183AR1-01|*Panopeidae*  
*Dyspanopeus sayi*|L228AR1-02|*Panopeidae*

Dyspanopeus sayi|L154AR1-06|Panopeidae  
 Dyspanopeus sayi|L183AR1-01|Panopeidae  
 Dyspanopeus sayi|L228AR1-02|Panopeidae  
 Rhithropanopeus harrisii|FJ517521|Panopeidae  
 Rhithropanopeus harrisii|FJ517515|Panopeidae  
 Rhithropanopeus harrisii|FJ517523|Panopeidae  
 Rhithropanopeus harrisii|FJ517524|Panopeidae  
 Rhithropanopeus harrisii|FJ517453|Panopeidae  
 Rhithropanopeus harrisii|FJ517471|Panopeidae  
 Rhithropanopeus harrisii|FJ517512|Panopeidae  
 Rhithropanopeus harrisii|FJ517398|Panopeidae  
 Rhithropanopeus harrisii|DQ094793|Panopeidae  
 Rhithropanopeus harrisii|DQ094800|Panopeidae  
 Erimacrus isenbeckii|AB241420|Cheiragonidae  
 Telmessus acutidens|AB278153|Cheiragonidae  
 Telmessus cheiragonus|AB211304|Cheiragonidae  
 Pandalopsis coccinata|AB290213|Pandalidae  
 Pilumnus hirtellus|JSDAz135|Pilumnidae  
 Pilumnus hirtellus|JSDUK173|Pilumnidae  
 Pilumnus hirtellus|JSDUK174|Pilumnidae  
 Pilumnus inermis|FCDPH14-550D69|Pilumnidae  
 Eriocheir leptognathus|AF316537|Varunidae  
 Eriocheir leptognathus|AF516701|Varunidae  
 Grapsus adscensoris|JSDAz28|Grapsidae  
 Grapsus adscensoris|JSDAz29|Grapsidae  
 Grapsus adscensoris|JSDAz30|Grapsidae  
 Gaetice depressus|AF317339|Varunidae  
 Gaetice depressus|AF516703|Varunidae  
 Eriocheir formosa|AF105250|Varunidae  
 Eriocheir formosa|AF105249|Varunidae  
 Eriocheir formosa|FJ750332|Varunidae  
 Eriocheir formosa|AF317326|Varunidae  
 Eriocheir formosa|AF516698|Varunidae  
 Eriocheir rectus|AF317332|Varunidae  
 Eriocheir hepuensis|AF317327|Varunidae  
 Eriocheir hepuensis|AF516699|Varunidae  
 Eriocheir hepuensis|AF317328|Varunidae  
 Eriocheir japonica|FJ750321|Varunidae  
 Eriocheir japonica|FJ750323|Varunidae  
 Eriocheir japonica|FJ750326|Varunidae  
 Eriocheir hepuensis|NC\_011598|Varunidae  
 Eriocheir hepuensis|FJ455506|Varunidae  
 Eriocheir japonica|AY640089|Varunidae  
 Eriocheir japonica|AY640092|Varunidae  
 Eriocheir japonica|NC\_011597|Varunidae  
 Eriocheir japonica|FJ750314|Varunidae  
 Eriocheir japonica|FJ750319|Varunidae  
 Eriocheir japonica|AY640095|Varunidae  
 Eriocheir japonica|AY640101|Varunidae  
 Eriocheir ogasawaraensis|FJ750330|Varunidae  
 Eriocheir ogasawaraensis|FJ750331|Varunidae  
 Eriocheir sinensis|AF435114|Varunidae  
 Eriocheir sinensis|AF435118|Varunidae  
 Eriocheir sinensis|AF435119|Varunidae  
 Eriocheir sinensis|FJ750306|Varunidae  
 Eriocheir sinensis|AY640083|Varunidae  
 Eriocheir sinensis|FJ750308|Varunidae  
 Eriocheir sinensis|FJ750310|Varunidae  
 Eriocheir sinensis|FJ455507|Varunidae  
 Eriocheir sinensis|FJ750309|Varunidae  
 Eriocheir sinensis|AY640086|Varunidae  
 Hemigrapsus sexdentatus|FJ518783|Varunidae  
 Chasmagnathus convexus|AB334555|Varunidae  
 Chasmagnathus convexus|AB334556|Varunidae  
 Helice latimera|AB334545|Varunidae  
 Helice formosensis|AB334543|Varunidae  
 Helice formosensis|AB334544|Varunidae  
 Helice tientsinensis|AB334546|Varunidae  
 Helice tientsinensis|AB334547|Varunidae  
 Helice tridens|AB334548|Varunidae  
 Helice tridens|AB334549|Varunidae  
 Helicana doerjesi|AB334554|Varunidae  
 Helicana japonica|AB334552|Varunidae  
 Helicana japonica|AB334553|Varunidae  
 Helicana wuana|AB334550|Varunidae  
 Helicana wuana|AB334551|Varunidae  
 Hemigrapsus sanguineus|EU169919|Varunidae  
 Hemigrapsus sanguineus|AF317340|Varunidae  
 Hemigrapsus sanguineus|EU169901|Varunidae  
 Hemigrapsus sanguineus|EU169906|Varunidae  
 Hemigrapsus sanguineus|EU169920|Varunidae  
 Hemigrapsus sanguineus|EU169915|Varunidae  
 Hemigrapsus sanguineus|EU169909|Varunidae  
 Hemigrapsus sanguineus|EU169912|Varunidae  
 Hemigrapsus sanguineus|EU169921|Varunidae  
 Hemigrapsus sanguineus|EU169922|Varunidae  
 Paragrapsus laevis|FJ812294|Varunidae  
 Pseudohelice subquadrata|AB334557|Varunidae  
 Minuca pugnax|FJ693649|Ocypodidae  
 Minuca pugnax|FJ693568|Ocypodidae  
 Minuca pugnax|FJ693573|Ocypodidae  
 Minuca pugnax|FJ693564|Ocypodidae  
 Minuca pugnax|FJ693565|Ocypodidae  
 Minuca pugnax|FJ693574|Ocypodidae  
 Minuca pugnax|FJ693643|Ocypodidae  
 Minuca pugnax|FJ693648|Ocypodidae  
 Minuca pugnax|FJ693576|Ocypodidae  
 Minuca pugnax|FJ693650|Ocypodidae

Minuca pugnax|F093546|Ocypodidae  
 Minuca pugnax|FJ693576|Ocypodidae  
 Minuca pugnax|FJ693650|Ocypodidae  
 Uca minax|FJ693527|Ocypodidae  
 Uca minax|FJ693520|Ocypodidae  
 Uca minax|FJ693549|Ocypodidae  
 Uca minax|FJ693518|Ocypodidae  
 Uca minax|FJ693526|Ocypodidae  
 Uca minax|FJ693519|Ocypodidae  
 Uca minax|FJ693551|Ocypodidae  
 Uca minax|FJ693547|Ocypodidae  
 Uca minax|FJ693552|Ocypodidae  
 Uca minax|FJ693557|Ocypodidae  
 Percnon gibbesi|JSDAz76|Plagusidae  
 Percnon gibbesi|JSDAz77|Plagusidae  
 Percnon gibbesi|JSDAz40|Plagusidae  
 Percnon gibbesi|JSDAz39|Plagusidae  
 Percnon gibbesi|JSDAz41|Plagusidae  
 Percnon gibbesi|JSDAz75|Plagusidae  
 Percnon gibbesi|JSDAz79|Plagusidae  
 Pachygrapsus marmoratus|JSDMe62|Grapsidae  
 Pachygrapsus maurus|JSDAz05|Grapsidae  
 Pachygrapsus marmoratus|JSDAz08|Grapsidae  
 Pachygrapsus marmoratus|JSDAz02|Grapsidae  
 Pachygrapsus marmoratus|JSDAz03|Grapsidae  
 Pachygrapsus marmoratus|JSDAz09|Grapsidae  
 Pachygrapsus maurus|JSDAz44|Grapsidae  
 Varuna litterata|AF317343|Varunidae  
 Varuna litterata|AF516704|Varunidae  
 Homola barbata|JSDPXM34-01|Homolidae  
 Homola barbata|MSM01-03-242\_95|Homolidae  
 Latreillia elegans|JSDMe18|Latreilliidae  
 Latreillia elegans|FCFOPC049-04|Latreilliidae  
 Latreillia elegans|JSDPX41-01|Latreilliidae  
 Latreillia elegans|JSDPX44-08|Latreilliidae  
 Guinotia dentata|AY803593|Pseudothelphusidae  
 Inachus dorsettensis|FCFOPC045-10|Inachidae  
 Inachus dorsettensis|FCDOPB074-03|Inachidae  
 Inachus dorsettensis|FCDOPB074-01|Inachidae  
 Inachus dorsettensis|FCDOPB074-02|Inachidae  
 Inachus dorsettensis|FCDOPB077-06|Inachidae  
 Inachus dorsettensis|FCFOP42-19|Inachidae  
 Inachus dorsettensis|FCFOP42-20|Inachidae  
 Inachus dorsettensis|FCFOP42-22|Inachidae  
 Inachus dorsettensis|FCFOPC045-12|Inachidae  
 Inachus dorsettensis|JSDUK46|Inachidae  
 Inachus leptochirus|FCFOPC057-06|Inachidae  
 Macropodia rostrata|JSDUK107|Inachidae  
 Macropodia rostrata|JSDUK108|Inachidae  
 Macropodia rostrata|JSDUK110|Inachidae  
 Macropodia tenuirostris|JSDMe26|Inachidae  
 Macropodia tenuirostris|JSDPX32-03|Inachidae  
 Macropodia tenuirostris|FCFOPC045-09|Inachidae  
 Macropodia longipes|FCDOPB068-10|Inachidae  
 Macropodia longipes|FCDOPB084-05|Inachidae  
 Macropodia longipes|FCDOPB086-09|Inachidae  
 Macropodia longipes|FCDOPB087-03|Inachidae  
 Macropodia longipes|FCFOP70-23|Inachidae  
 Macropodia tenuirostris|JSDMe25|Inachidae  
 Macropodia tenuirostris|JSDMe27|Inachidae  
 Macropodia tenuirostris|JSDPXM06-03|Inachidae  
 Macropodia tenuirostris|JSDPXM32-01|Inachidae  
 Cymonomus granulatus|FCDPH15-581Gr56|Cymonomidae  
 Cymonomus granulatus|FCDPH15-581Gr59|Cymonomidae  
 Cymonomus granulatus|FCDPHMSM241\_105|Cymonomidae  
 Cymonomus granulatus|FCDPH15-581Gr58|Cymonomidae  
 Cymonomus granulatus|FCDPH15-581Gr57|Cymonomidae  
 Cymonomus granulatus|FCDPHMSM241\_106|Cymonomidae  
 Ebalia nux|FCDPH15-569Gr66|Leucosiidae  
 Ebalia nux|FCDPH14-566Gr14|Leucosiidae  
 Ebalia nux|FCDPH14-566Gr65|Leucosiidae  
 Ebalia nux|FCDPH14-565B64|Leucosiidae  
 Ebalia nux|FCDPHMSM241\_103|Leucosiidae  
 Ebalia nux|FCDPHMSM241\_104|Leucosiidae  
 Ebalia nux|FCDPHMSM321\_97|Leucosiidae  
 Heterocrypta occidentalis|EU682829|Parthenopidae  
 Dromia personata|JSDAz130|Dromiidae  
 Dromia personata|JSDAz199|Dromiidae  
 Hydrothelphusa goudoti|AY803579|Potamonautidae  
 Hydrothelphusa agilis|AY803578|Potamonautidae  
 Hydrothelphusa madagascariensis|AY803580|Potamonautidae  
 Marojejy longimerus|AY803582|Potamonautidae  
 Potamonautes lirrangensis|AY803568|Potamonautidae  
 Potamonautes obesus|AY803570|Potamonautidae  
 Potamonautes oderhi|AY803571|Potamonautidae  
 Johora tahanensis|AB290642|Potamidae  
 Johora thoi|AB290643|Potamidae  
 Johora grallator|AB290635|Potamidae  
 Johora gua|AB290636|Potamidae  
 Johora punicea|AB290640|Potamidae  
 Johora gapensis|AB290634|Potamidae  
 Johora intermedia|AB290637|Potamidae  
 Johora johorensis|AB290638|Potamidae  
 Johora murphyi|AB290639|Potamidae  
 Johora singaporensis|AB290641|Potamidae  
 Johora counsilmani|AB290633|Potamidae  
 Johora tiomanensis|AB290644|Potamidae  
 Phricotelphusa limula|AY803591|Gecarcinucidae  
 Sactoriana spinigera|AY803592|Gecarcinucidae

Johora tiomanensis|AB290644|Potamidae  
 Phricotelphusa limula|AY803591|Gecarcinucidae  
 Sartoriana spinigera|AY803592|Gecarcinucidae  
 Sayamia sexpunctata|AY803590|Gecarcinucidae  
 Somanniathelphusa qiongshanensis|AB265248|Gecarcinucidae  
 Somanniathelphusa zanklon|AB265245|Gecarcinucidae  
 Somanniathelphusa zanklon|AB265244|Gecarcinucidae  
 Somanniathelphusa zanklon|AB265247|Gecarcinucidae  
 Somanniathelphusa amoyensis|AB265242|Gecarcinucidae  
 Somanniathelphusa taiwanensis|AB265239|Gecarcinucidae  
 Somanniathelphusa taiwanensis|AB265240|Gecarcinucidae  
 Somanniathelphusa taiwanensis|AB265241|Gecarcinucidae  
 Somanniathelphusa zhangpuensis|AB265243|Gecarcinucidae  
 Somanniathelphusa zhapoensis|AB265246|Gecarcinucidae  
 Himalayapotamon atkinsonianum|AB290651|Potamidae  
 Potamon fluviatilis|AY803584|Potamidae  
 Nanhaipotamon pingyuanense|AB265249|Potamidae  
 Geothelphusa aramotoi|AB266312|Potamidae  
 Geothelphusa dehaani|NC\_007379|Potamidae  
 Geothelphusa dehaani|AB187570|Potamidae  
 Geothelphusa dehaani|AB290648|Potamidae  
 Geothelphusa sakamotoana|AB266313|Potamidae  
 Geothelphusa miyazakii|AB266311|Potamidae  
 Geothelphusa pingtung|AB266283|Potamidae  
 Geothelphusa pingtung|AB266284|Potamidae  
 Geothelphusa pingtung|AB266286|Potamidae  
 Geothelphusa pingtung|AB266287|Potamidae  
 Geothelphusa pingtung|AB266285|Potamidae  
 Geothelphusa pingtung|AB266289|Potamidae  
 Geothelphusa pingtung|AB266288|Potamidae  
 Geothelphusa pingtung|AB266290|Potamidae  
 Geothelphusa pingtung|AB266291|Potamidae  
 Geothelphusa ancylophallus|AB266280|Potamidae  
 Geothelphusa ancylophallus|AB266281|Potamidae  
 Geothelphusa ancylophallus|AB266282|Potamidae  
 Geothelphusa candidiensis|AB453221|Potamidae  
 Geothelphusa candidiensis|AB453222|Potamidae  
 Geothelphusa olea|AB266268|Potamidae  
 Geothelphusa olea|AB266274|Potamidae  
 Geothelphusa olea|AB266269|Potamidae  
 Geothelphusa olea|AB266266|Potamidae  
 Geothelphusa olea|AB266270|Potamidae  
 Geothelphusa olea|AB266271|Potamidae  
 Geothelphusa olea|AB266276|Potamidae  
 Geothelphusa olea|AB266272|Potamidae  
 Geothelphusa olea|AB266277|Potamidae  
 Geothelphusa olea|AB266278|Potamidae  
 Geothelphusa siasiat|AB453219|Potamidae  
 Geothelphusa siasiat|AB453218|Potamidae  
 Geothelphusa siasiat|AB453220|Potamidae  
 Geothelphusa tali|AB453226|Potamidae  
 Geothelphusa bicolor|AB266306|Potamidae  
 Geothelphusa ferruginea|AB266304|Potamidae  
 Geothelphusa albogilva|AB266292|Potamidae  
 Geothelphusa albogilva|AB266293|Potamidae  
 Geothelphusa albogilva|AB266294|Potamidae  
 Geothelphusa albogilva|AB266295|Potamidae  
 Geothelphusa albogilva|AB266296|Potamidae  
 Geothelphusa tawu|AB266297|Potamidae  
 Geothelphusa tawu|AB266298|Potamidae  
 Geothelphusa tawu|AB266299|Potamidae  
 Geothelphusa tawu|AB266300|Potamidae  
 Geothelphusa tawu|AB266301|Potamidae  
 Geothelphusa tawu|AB266302|Potamidae  
 Geothelphusa tawu|AB266303|Potamidae  
 Candidiopotamon rathbunae|AB290649|Potamidae  
 Stoliczia chaseni|AB290645|Potamidae  
 Ryukyum yaeyamense|AB290650|Potamidae  
 Terrapotamon abbotti|AB290646|Potamidae  
 Medorippe lanata|JSDMe13|Dorippidae  
 Medorippe lanata|JSDMe12|Dorippidae  
 Medorippe lanata|JSDMe81|Dorippidae  
 Amarinus paralacustris|FJ812290|Hymenosomatidae  
 Hymenosoma hodgkini|FJ812291|Hymenosomatidae  
 Elamena producta|FJ812283|Hymenosomatidae  
 Hymenosoma depressum|FJ812285|Hymenosomatidae  
 Halicarcinus innominatus|FJ812287|Hymenosomatidae  
 Halicarcinus ovatus|FJ812286|Hymenosomatidae  
 Halicarcinus cookii|FJ812288|Hymenosomatidae  
 Halicarcinus varius|FJ812289|Hymenosomatidae  
 Neohymenicus pubescens|FJ812284|Hymenosomatidae  
 Hymenosoma geometricum|EF198479|Hymenosomatidae  
 Hymenosoma geometricum|EF198481|Hymenosomatidae  
 Hymenosoma geometricum|EF198478|Hymenosomatidae  
 Hymenosoma geometricum|EF198480|Hymenosomatidae  
 Hymenosoma geometricum|EF198482|Hymenosomatidae  
 Hymenosoma orbiculare|DQ351392|Hymenosomatidae  
 Hymenosoma orbiculare|DQ351390|Hymenosomatidae  
 Hymenosoma orbiculare|DQ351397|Hymenosomatidae  
 Hymenosoma orbiculare|DQ351402|Hymenosomatidae  
 Hymenosoma orbiculare|DQ351403|Hymenosomatidae  
 Hymenosoma orbiculare|DQ351416|Hymenosomatidae  
 Hymenosoma orbiculare|DQ351420|Hymenosomatidae  
 Hymenosoma orbiculare|DQ351421|Hymenosomatidae  
 Hymenosoma orbiculare|DQ351424|Hymenosomatidae  
 Hymenosoma orbiculare|DQ351426|Hymenosomatidae  
 Neorhynchoplax bovis|EF198477|Hymenosomatidae  
 Maja goltzianna|JSDPX18-01|Majidae

Hymenosoma orbiculare|DQ351426|Hymenosomatidae  
 Neorhynchoplax bovis|EF198477|Hymenosomatidae  
 Maja goltzianna|JSDPX18-01|Majidae  
 Maja goltzianna|JSDPXA21-01|Majidae  
 Maja brachydactyla|EU000820|Majidae  
 Maja brachydactyla|EU000824|Majidae  
 Maja brachydactyla|EU000816|Majidae  
 Maja brachydactyla|JSDAz202|Majidae  
 Maja brachydactyla|EU000811|Majidae  
 Maja brachydactyla|EU000815|Majidae  
 Maja brachydactyla|EU000825|Majidae  
 Maja brachydactyla|EU000823|Majidae  
 Maja brachydactyla|EU000822|Majidae  
 Maja brachydactyla|EU000829|Majidae  
 Maja crispata|EU000839|Majidae  
 Maja crispata|EU000841|Majidae  
 Maja crispata|EU000844|Majidae  
 Maja crispata|EU000847|Majidae  
 Maja crispata|EU000837|Majidae  
 Maja crispata|EU000845|Majidae  
 Maja crispata|EU000836|Majidae  
 Maja crispata|EU000843|Majidae  
 Maja crispata|EU000848|Majidae  
 Maja crispata|EU000849|Majidae  
 Maja squinado|EU000832|Majidae  
 Maja squinado|EU000834|Majidae  
 Maja squinado|EU000833|Majidae  
 Maja squinado|EU000835|Majidae  
 Metoporphaphis calcarata|EU682830|Inachidae  
 Micippa thalia|EU682844|Majidae  
 Pittho lherminieri|EU682839|Epiplatidae  
 Goneplax rhomboides|JSDUK37|Goneplacidae  
 Goneplax rhomboides|FCFOPC041-25|Goneplacidae  
 Goneplax rhomboides|JSDUK39|Goneplacidae  
 Goneplax rhomboides|FCFOP66-10|Goneplacidae  
 Goneplax rhomboides|FCFOP66-01|Goneplacidae  
 Goneplax rhomboides|FCDOPB083-09|Goneplacidae  
 Goneplax rhomboides|FCDOPB083-08|Goneplacidae  
 Goneplax rhomboides|JSDPX63-06|Goneplacidae  
 Goneplax rhomboides|FCFOPC041-27|Goneplacidae  
 Goneplax rhomboides|JSDUK41|Goneplacidae  
 Pandalus eous|AB211294|Pandalidae  
 Munida leviannata|AY350974|Galatheidae  
 Aniculus aniculus|EF683578|Diogenidae  
 Aniculus retipes|EF683579|Diogenidae  
 Galathea dispersa|JSDUK30|Galatheidae  
 Raymunida cagnetei|AF283870|Galatheidae  
 Raymunida cagnetei|AF283869|Galatheidae  
 Raymunida cagnetei|AF283871|Galatheidae  
 Raymunida elegantissima|AF283877|Galatheidae  
 Raymunida elegantissima|AF283876|Galatheidae  
 Raymunida elegantissima|AF283875|Galatheidae  
 Raymunida elegantissima|AF283878|Galatheidae  
 Raymunida elegantissima|AF283879|Galatheidae  
 Raymunida elegantissima|AF283880|Galatheidae  
 Raymunida elegantissima|AF283881|Galatheidae  
 Raymunida erythrina|AF283882|Galatheidae  
 Raymunida erythrina|AF283883|Galatheidae  
 Alainius crosnieri|AY351050|Galatheidae  
 Alainius crosnieri|AY351048|Galatheidae  
 Alainius crosnieri|AY351049|Galatheidae  
 Alainius crosnieri|AY351051|Galatheidae  
 Raymunida confundens|AF283872|Galatheidae  
 Raymunida confundens|AF283873|Galatheidae  
 Raymunida dextralis|AF283874|Galatheidae  
 Raymunida formosanus|AY288292|Galatheidae  
 Raymunida insulata|AF283884|Galatheidae  
 Munida clinata|AY350940|Galatheidae  
 Munida clinata|AY350941|Galatheidae  
 Munida clinata|AY350942|Galatheidae  
 Munida acantha|AY350925|Galatheidae  
 Munida acantha|AY350926|Galatheidae  
 Munida acantha|AY350927|Galatheidae  
 Munida acantha|AY350928|Galatheidae  
 Munida acantha|AY800033|Galatheidae  
 Munida stia|AY350998|Galatheidae  
 Munida stia|AY350999|Galatheidae  
 Munida stia|AY351000|Galatheidae  
 Munida stia|AY351001|Galatheidae  
 Munida proto|AY350986|Galatheidae  
 Munida spilota|AY350996|Galatheidae  
 Munida spilota|AY350997|Galatheidae  
 Munida armilla|AY350937|Galatheidae  
 Munida armilla|AY350938|Galatheidae  
 Munida distiza|AY350946|Galatheidae  
 Munida distiza|AY350947|Galatheidae  
 Munida distiza|AY350948|Galatheidae  
 Munida distiza|AY350949|Galatheidae  
 Munida distiza|AY350950|Galatheidae  
 Munida guttata|AY350961|Galatheidae  
 Munida guttata|AY350960|Galatheidae  
 Munida guttata|AY350959|Galatheidae  
 Munida guttata|AY350962|Galatheidae  
 Munida taenia|AY351006|Galatheidae  
 Munida taenia|AY351005|Galatheidae  
 Munida taenia|AY351002|Galatheidae  
 Munida taenia|AY351007|Galatheidae  
 Munida taenia|AY351004|Galatheidae  
 Munida taenia|AY351003|Galatheidae



Munida taenia|AY351007|Galatheidae  
Munida taenia|AY351004|Galatheidae  
Munida taenia|AY351003|Galatheidae  
Munida taenia|AY351008|Galatheidae  
Munida notata|AY350976|Galatheidae  
Munida notata|AY350977|Galatheidae  
Munida notata|AY350978|Galatheidae  
Munida notata|AY350979|Galatheidae  
Munida leagora|AY350963|Galatheidae  
Munida leagora|AY350964|Galatheidae  
Munida leagora|AY350965|Galatheidae  
Munida leagora|AY350966|Galatheidae  
Munida leagora|AY350967|Galatheidae  
Munida leagora|AY350968|Galatheidae  
Munida leagora|AY350969|Galatheidae  
Munida leagora|AY350970|Galatheidae  
Munida leagora|AY350971|Galatheidae  
Munida tyche|AY351016|Galatheidae  
Munida tyche|AY351017|Galatheidae  
Munida rugosa|FCDOPB084-04|Galatheidae  
Munida leptosyne|AY350973|Galatheidae  
Shinkaia crosnieri|EU420129|Galatheidae  
Shinkaia crosnieri|NC\_011013|Galatheidae  
Munida ofella|AY350980|Galatheidae  
Munida rutllanti|FCFOPC045-03|Galatheidae  
Munida rutllanti|FCFOPC045-05|Galatheidae  
Munida rutllanti|FCFOPC045-02|Galatheidae  
Munida rutllanti|FCFOPC045-04|Galatheidae  
Munida rutllanti|JSDMe53|Galatheidae  
Munida rutllanti|FCFOPC045-01|Galatheidae  
Munida rutllanti|JSDMe54|Galatheidae  
Cervimunida johni|AY351054|Galatheidae  
Munida subrugosa|AY700169|Galatheidae  
Munida gregaria|AY700165|Galatheidae  
Munida subrugosa|AY700173|Galatheidae  
Munida subrugosa|AY700174|Galatheidae  
Munida subrugosa|AY700166|Galatheidae  
Munida subrugosa|AY700171|Galatheidae  
Munida gregaria|AY700164|Galatheidae  
Munida subrugosa|AY700175|Galatheidae  
Munida subrugosa|AY700172|Galatheidae  
Munida subrugosa|AY700168|Galatheidae  
Munida gregaria|AY700163|Galatheidae  
Munida subrugosa|AY700167|Galatheidae  
Munida subrugosa|AY700176|Galatheidae  
Munida quadrispina|FC-VSA135A|Galatheidae  
Munida quadrispina|FC-VSA141A|Galatheidae  
Munida quadrispina|FC-VSA6|Galatheidae  
Pleuroncodes monodon|AY351062|Galatheidae  
Agononida sphecia|AY350922|Galatheidae  
Agononida sphecia|AY350919|Galatheidae  
Agononida sphecia|AY350918|Galatheidae  
Agononida sphecia|AY350920|Galatheidae  
Agononida sphecia|AY350921|Galatheidae  
Agononida sphecia|AY350923|Galatheidae  
Agononida marini|AY350914|Galatheidae  
Bathymunida nebulosa|AY351052|Galatheidae  
Bathymunida nebulosa|AY351053|Galatheidae  
Paramunida pronoe|AY351040|Galatheidae  
Paramunida labis|AY351032|Galatheidae  
Paramunida labis|AY351033|Galatheidae  
Paramunida pictura|AY351037|Galatheidae  
Paramunida pictura|AY351036|Galatheidae  
Paramunida pictura|AY351038|Galatheidae  
Paramunida pictura|AY351039|Galatheidae  
Paramunida stichas|AY351041|Galatheidae  
Paramunida stichas|AY351042|Galatheidae  
Paramunida stichas|AY351043|Galatheidae  
Paramunida belone|AY351030|Galatheidae  
Paramunida luminata|AY351034|Galatheidae  
Paramunida luminata|AY351035|Galatheidae  
Paramunida thalie|AY351046|Galatheidae  
Paramunida thalie|AY351044|Galatheidae  
Paramunida thalie|AY351045|Galatheidae  
Paramunida thalie|AY351047|Galatheidae  
Crosnierita dicata|AY350924|Galatheidae  
Agononida procera|AY350916|Galatheidae  
Agononida procera|AY350917|Galatheidae  
Agononida similis|AY350915|Galatheidae  
Onconida alaini|AY351056|Galatheidae  
Onconida alaini|AY351057|Galatheidae  
Onconida alaini|AY351058|Galatheidae  
Onconida tropis|AY351059|Galatheidae  
Onconida tropis|AY351060|Galatheidae  
Agononida incerta|AF283888|Galatheidae  
Agononida incerta|AF283889|Galatheidae  
Plesionida aliena|AY351061|Galatheidae  
Munida intermedia|FCDPHM52\_118|Galatheidae  
Munida pagesi|AY350985|Galatheidae  
Munida eclipsis|AY350951|Galatheidae  
Munida eclipsis|AY350952|Galatheidae  
Munida eclipsis|AY350953|Galatheidae  
Munida militaris|AY350975|Galatheidae  
Munida rhodonia|AF283885|Galatheidae  
Munida rhodonia|AF283886|Galatheidae  
Munida congesta|AY350945|Galatheidae  
Munida rosula|AY350994|Galatheidae  
Munida compressa|AY350943|Galatheidae

Munida congesta|AY350945|Galatheidae  
Munida rosula|AY350994|Galatheidae  
Munida compressa|AY350943|Galatheidae  
Munida compressa|AY350944|Galatheidae  
Munida rubrodigitalis|AF283887|Galatheidae  
Munida tioresias|AY351014|Galatheidae  
Munida alonsoi|AY350929|Galatheidae  
Munida alonsoi|AY350930|Galatheidae  
Munida alonsoi|AY350931|Galatheidae  
Munida alonsoi|AY350932|Galatheidae  
Munida alonsoi|AY350933|Galatheidae  
Munida alonsoi|AY350934|Galatheidae  
Munida alonsoi|AY350935|Galatheidae  
Munida alonsoi|AY350936|Galatheidae  
Munida psamathe|AY350987|Galatheidae  
Munida psamathe|AY350988|Galatheidae  
Munida psamathe|AY350989|Galatheidae  
Munida psamathe|AY350990|Galatheidae  
Munida psamathe|AY350991|Galatheidae  
Munida gordoae|AY350956|Galatheidae  
Munida gordoae|AY350957|Galatheidae  
Munida gordoae|AY350954|Galatheidae  
Munida gordoae|AY350955|Galatheidae  
Munida gordoae|AY350958|Galatheidae  
Munida rogeri|AY350993|Galatheidae  
Munida lenticularis|AY350972|Galatheidae  
Munida ommata|AY350981|Galatheidae  
Munida ommata|AY350982|Galatheidae  
Munida ommata|AY350983|Galatheidae  
Munida ommata|AY350984|Galatheidae  
Munida psylla|AY350992|Galatheidae  
Munida rufiantennulata|AY350995|Galatheidae  
Munida thoe|DQ011198|Galatheidae  
Munida thoe|AY800039|Galatheidae  
Munida thoe|AY800043|Galatheidae  
Munida thoe|AY800046|Galatheidae  
Munida thoe|AY800041|Galatheidae  
Munida thoe|AY800034|Galatheidae  
Munida thoe|DQ011191|Galatheidae  
Munida thoe|AY800042|Galatheidae  
Munida thoe|DQ011200|Galatheidae  
Munida thoe|DQ011204|Galatheidae  
Munida zebra|AY800047|Galatheidae  
Munida zebra|AY800055|Galatheidae  
Munida zebra|AY351023|Galatheidae  
Munida zebra|AY351021|Galatheidae  
Munida zebra|AY800056|Galatheidae  
Munida zebra|AY800048|Galatheidae  
Munida zebra|AY800050|Galatheidae  
Munida zebra|AY800049|Galatheidae  
Munida zebra|AY800053|Galatheidae  
Munida zebra|DQ011206|Galatheidae  
Munida spinosa|AY700177|Galatheidae  
Munida spinosa|AY700178|Galatheidae  
Munida spinosa|AY700179|Galatheidae  
Paramunida granulata|AY351031|Galatheidae  
Babamunida hystrix|EF136570|Galatheidae  
Babamunida hystrix|EF136571|Galatheidae  
Munida callista|AY350939|Galatheidae  
Munida tuberculata|AY351015|Galatheidae  
Polycheles typhlops|EU377740|Polychelidae  
Polycheles typhlops|EU377738|Polychelidae  
Polycheles typhlops|JSDPX15-16|Polychelidae  
Polycheles typhlops|JSDPX15-14|Polychelidae  
Polycheles typhlops|JSDPX15-15|Polychelidae  
Polycheles typhlops|FJ174943|Polychelidae  
Polycheles typhlops|FCFOPC052-02|Polychelidae  
Polycheles typhlops|JSDUKdeep\_56|Polychelidae  
Polycheles typhlops|JSDUKdeep\_58|Polychelidae  
Polycheles typhlops|JSDUKdeep\_59|Polychelidae  
Polycheles sculptus|EU377741|Polychelidae  
Stereomastis grimaldi|JSDUKdeep\_41|Polychelidae  
Stereomastis grimaldi|JSDUKdeep\_43|Polychelidae  
Stylopandalus richardi|FCFOPC047-08|Pandalidae  
Petrolisthes armatus|FJ693419|Porcellanidae  
Petrolisthes armatus|FJ693436|Porcellanidae  
Petrolisthes armatus|FJ693498|Porcellanidae  
Petrolisthes armatus|FJ693421|Porcellanidae  
Petrolisthes armatus|FJ693381|Porcellanidae  
Petrolisthes armatus|FJ693492|Porcellanidae  
Petrolisthes armatus|FJ693429|Porcellanidae  
Petrolisthes armatus|FJ693450|Porcellanidae  
Petrolisthes armatus|FJ693473|Porcellanidae  
Petrolisthes armatus|FJ693506|Porcellanidae  
Jaxea nocturna|JSDPX23-04|Laomediidae  
Pagurus alatus|FCFOPC052-11|Paguridae  
Pagurus alatus|FCFOPC047-01|Paguridae  
Pagurus alatus|FCFOPC054-06|Paguridae  
Pagurus alatus|FCFOPC043-01|Paguridae  
Pagurus alatus|FCFOPC047-04|Paguridae  
Pagurus cuanensis|JSDAz197|Paguridae  
Pagurus cuanensis|JSDAz65|Paguridae  
Pagurus excavatus|FCFOP42-12|Paguridae  
Pagurus excavatus|FCDOPB086-10|Paguridae  
Pagurus excavatus|FCFOP42-13|Paguridae  
Pagurus excavatus|FCFOP42-11|Paguridae  
Pagurus excavatus|FCDOPB076-17|Paguridae  
Pagurus excavatus|JSDMe03|Paguridae

Pagurus excavatus|FCFOP42-11|Paguridae  
 Pagurus excavatus|FCDOPB076-17|Paguridae  
 Pagurus excavatus|JSDMe03|Paguridae  
 Pagurus excavatus|JSDMe04|Paguridae  
 Pagurus excavatus|JSDMe05|Paguridae  
 Pagurus prideauxi|FCDOPB071-10|Paguridae  
 Pagurus prideauxi|FCFOP42-14|Paguridae  
 Pagurus prideauxi|JSDN09|Paguridae  
 Pagurus prideauxi|JSDUK147|Paguridae  
 Pagurus prideauxi|JSDN11|Paguridae  
 Pagurus prideauxi|FCFOP42-18|Paguridae  
 Pagurus prideauxi|FCDOPB074-06|Paguridae  
 Pagurus prideauxi|FCDOPB071-12|Paguridae  
 Pagurus prideauxi|FCDOPB071-8|Paguridae  
 Pagurus prideauxi|JSDUK159|Paguridae  
 Upogebia africana|DQ351382|Upogebiidae  
 Upogebia africana|DQ351380|Upogebiidae  
 Upogebia africana|DQ351379|Upogebiidae  
 Upogebia africana|DQ351381|Upogebiidae  
 Upogebia africana|DQ351383|Upogebiidae  
 Upogebia africana|DQ351384|Upogebiidae  
 Upogebia africana|DQ351385|Upogebiidae  
 Upogebia africana|DQ351386|Upogebiidae  
 Upogebia africana|DQ351387|Upogebiidae  
 Upogebia africana|DQ351388|Upogebiidae  
 Clibanarius erythropus|JSDAz115|Diogenidae  
 Clibanarius erythropus|JSDMe63|Diogenidae  
 Clibanarius erythropus|JSDMe66|Diogenidae  
 Clibanarius erythropus|JSDMe67|Diogenidae  
 Pagurus longicarpus|L209AR1-01|Paguridae  
 Pagurus longicarpus|L154AR1-08|Paguridae  
 Pagurus longicarpus|L190AR1-01|Paguridae  
 Pagurus longicarpus|L183AR1-03|Paguridae  
 Pagurus longicarpus|L190AR1-02|Paguridae  
 Pagurus longicarpus|L183AR1-02|Paguridae  
 Pagurus longicarpus|L210AR4-04|Paguridae  
 Pagurus longicarpus|L228AR1-01|Paguridae  
 Eumunida laevimana|EU243497|Chiostylidae  
 Eumunida laevimana|EU243508|Chiostylidae  
 Eumunida laevimana|EU243509|Chiostylidae  
 Eumunida laevimana|EU243510|Chiostylidae  
 Eumunida marginata|EU243543|Chiostylidae  
 Eumunida capillata|EU243341|Chiostylidae  
 Eumunida capillata|EU243342|Chiostylidae  
 Eumunida capillata|EU243343|Chiostylidae  
 Eumunida minor|EU243549|Chiostylidae  
 Eumunida minor|EU243547|Chiostylidae  
 Eumunida minor|EU243551|Chiostylidae  
 Eumunida minor|EU243550|Chiostylidae  
 Eumunida minor|EU243502|Chiostylidae  
 Eumunida minor|EU243552|Chiostylidae  
 Eumunida minor|EU243553|Chiostylidae  
 Eumunida minor|EU243548|Chiostylidae  
 Eumunida minor|EU243554|Chiostylidae  
 Eumunida annulosa|AY800019|Chiostylidae  
 Eumunida annulosa|EU243412|Chiostylidae  
 Eumunida annulosa|EU243461|Chiostylidae  
 Eumunida annulosa|DQ011186|Chiostylidae  
 Eumunida annulosa|DQ011185|Chiostylidae  
 Eumunida annulosa|EU243357|Chiostylidae  
 Eumunida annulosa|AY800021|Chiostylidae  
 Eumunida annulosa|EU243361|Chiostylidae  
 Eumunida annulosa|EU243470|Chiostylidae  
 Eumunida annulosa|EU243496|Chiostylidae  
 Eumunida multilineata|EU243546|Chiostylidae  
 Eumunida picta|EU243557|Chiostylidae  
 Eumunida picta|EU243558|Chiostylidae  
 Eumunida picta|EU243556|Chiostylidae  
 Eumunida similior|EU243498|Chiostylidae  
 Eumunida squamifera|EU243559|Chiostylidae  
 Eumunida squamifera|EU243560|Chiostylidae  
 Eumunida spinosa|EU243535|Chiostylidae  
 Eumunida spinosa|EU243534|Chiostylidae  
 Eumunida spinosa|EU243501|Chiostylidae  
 Eumunida spinosa|EU243537|Chiostylidae  
 Eumunida spinosa|EU243500|Chiostylidae  
 Eumunida spinosa|EU243540|Chiostylidae  
 Eumunida spinosa|EU243539|Chiostylidae  
 Eumunida spinosa|EU243536|Chiostylidae  
 Eumunida spinosa|EU243533|Chiostylidae  
 Eumunida spinosa|EU243542|Chiostylidae  
 Eumunida keijii|EU243337|Chiostylidae  
 Eumunida keijii|EU243338|Chiostylidae  
 Eumunida keijii|EU243340|Chiostylidae  
 Eumunida keijii|EU243514|Chiostylidae  
 Eumunida sternomaculata|EU243458|Chiostylidae  
 Eumunida sternomaculata|EU243476|Chiostylidae  
 Eumunida sternomaculata|EU243396|Chiostylidae  
 Eumunida sternomaculata|EU243450|Chiostylidae  
 Eumunida sternomaculata|AY800028|Chiostylidae  
 Eumunida sternomaculata|EU243426|Chiostylidae  
 Eumunida sternomaculata|AY800029|Chiostylidae  
 Eumunida sternomaculata|EU243433|Chiostylidae  
 Eumunida sternomaculata|EU243425|Chiostylidae  
 Eumunida sternomaculata|EU243483|Chiostylidae  
 Eumunida trequieri|EU243352|Chiostylidae  
 Eumunida trequieri|EU243358|Chiostylidae  
 Eumunida trequieri|EU243516|Chiostylidae  
 Eumunida trequieri|EU243359|Chiostylidae

Eumunida treguieri|EU243358|Chirostylidae  
 Eumunida treguieri|EU243516|Chirostylidae  
 Eumunida treguieri|EU243359|Chirostylidae  
 Eumunida treguieri|EU243562|Chirostylidae  
 Eumunida treguieri|EU243511|Chirostylidae  
 Eumunida treguieri|EU243512|Chirostylidae  
 Eumunida treguieri|EU243517|Chirostylidae  
 Pagurus acadianus|L215AR1-03|Paguridae  
 Pagurus acadianus|AF483156|Paguridae  
 Pagurus acadianus|PA01MD0306|Paguridae  
 Pagurus acadianus|PA02MD0306|Paguridae  
 Pagurus acadianus|BSM07T1-31|Paguridae  
 Pagurus bernhardus|JSDUK146|Paguridae  
 Pagurus bernhardus|JSDUK151|Paguridae  
 Pagurus bernhardus|JSDUK153|Paguridae  
 Pagurus bernhardus|JSDUK150|Paguridae  
 Pagurus bernhardus|JSDUK152|Paguridae  
 Pagurus bernhardus|FCDOPB089-05|Paguridae  
 Pagurus bernhardus|JSDUK149|Paguridae  
 Pagurus bernhardus|JSDUK154|Paguridae  
 Pagurus armatus|AF483159|Paguridae  
 Pagurus ochotensis|AF483158|Paguridae  
 Pagurus arcuatus|BSM07T3-01|Paguridae  
 Pagurus arcuatus|BSM07T3-02|Paguridae  
 Pagurus arcuatus|BSM07T3-03|Paguridae  
 Pagurus pubescens|JSDN23|Paguridae  
 Pagurus pubescens|GSL31-06|Paguridae  
 Pagurus pubescens|GSL31-05|Paguridae  
 Pagurus pubescens|GSL31-04|Paguridae  
 Pagurus pubescens|JSDSv01|Paguridae  
 Pagurus pubescens|JSDN15|Paguridae  
 Pagurus pubescens|JSDN14|Paguridae  
 Pagurus pubescens|JSDN22|Paguridae  
 Pagurus pubescens|JSDN05|Paguridae  
 Pagurus pubescens|JSDSv02|Paguridae  
 Acantholithodes hispidus|FC-VLC197|Hapalogastridae  
 Paralithodes brevipes|AB211298|Lithodidae  
 Paralithodes brevipes|AB211297|Lithodidae  
 Paralithodes brevipes|AB211299|Lithodidae  
 Paralithodes brevipes|AB211300|Lithodidae  
 Paralithodes camtschaticus|AB211303|Lithodidae  
 Lithodes couesi|FC-VMD11A|Lithodidae  
 Lithodes couesi|FC-VMD11B|Lithodidae  
 Lithodes maja|TE-004-01|Lithodidae  
 Lithodes maja|GSL31-24|Lithodidae  
 Lithodes maja|GSL31-25|Lithodidae  
 Lithodes maja|TE-004T153-01|Lithodidae  
 Lithodes maja|TE-004T22-01|Lithodidae  
 Lithodes maja|TE-004-02|Lithodidae  
 Lithodes maja|TE-004T88-03|Lithodidae  
 Lithodes longispina|AB476813|Lithodidae  
 Lithodes longispina|AB476814|Lithodidae  
 Lithodes longispina|AB476816|Lithodidae  
 Lithodes longispina|AB476815|Lithodidae  
 Lithodes longispina|AB476817|Lithodidae  
 Lithodes nintokuae|AB375150|Lithodidae  
 Lithodes nintokuae|AB375131|Lithodidae  
 Lithodes nintokuae|AB375133|Lithodidae  
 Lithodes nintokuae|AB375137|Lithodidae  
 Lithodes nintokuae|AB375138|Lithodidae  
 Lithodes nintokuae|AB375145|Lithodidae  
 Lithodes nintokuae|AB375147|Lithodidae  
 Lithodes nintokuae|AB375140|Lithodidae  
 Lithodes nintokuae|AB375149|Lithodidae  
 Lithodes nintokuae|AB375156|Lithodidae  
 Paralithodes platypus|AB211301|Lithodidae  
 Paralithodes platypus|AB211302|Lithodidae  
 Lopholithodes foraminatus|FC-VMH38D|Lithodidae  
 Lopholithodes foraminatus|FC-VMH38A|Lithodidae  
 Lopholithodes foraminatus|FC-VMH38E|Lithodidae  
 Neolithodes grimaldii|JSDUKdeep\_02|Lithodidae  
 Neolithodes grimaldii|JSDUKdeep\_01|Lithodidae  
 Neolithodes grimaldii|JSDUKdeep\_03|Lithodidae  
 Paralomis multispina|AB211296|Lithodidae  
 Paralomis multispina|AB428437|Lithodidae  
 Paralomis multispina|AB428441|Lithodidae  
 Paralomis multispina|AB375545|Lithodidae  
 Paralomis multispina|AB428438|Lithodidae  
 Paralomis multispina|AB428440|Lithodidae  
 Paralomis multispina|AB375544|Lithodidae  
 Paralomis multispina|FC-VOG11|Lithodidae  
 Paralomis multispina|AB428436|Lithodidae  
 Paralomis multispina|AB428442|Lithodidae  
 Paralomis pacifica|AB476747|Lithodidae  
 Paralomis pacifica|AB476748|Lithodidae  
 Paralomis pacifica|AB476749|Lithodidae  
 Paralomis pacifica|AB476750|Lithodidae  
 Leiogalathea laevirostris|AY351055|Galatheididae  
 Munidopsis curvirostra|MC01NFG106|Galatheididae  
 Munidopsis curvirostra|TE-004T169-01|Galatheididae  
 Munidopsis curvirostra|TE-004T88-02|Galatheididae  
 Munidopsis polymorpha|DQ860146|Galatheididae  
 Munidopsis quadrata|FC-VSB12A|Galatheididae  
 Munidopsis lauensis|EF157850|Galatheididae  
 Munidopsis lauensis|EF157851|Galatheididae  
 Munidopsis lauensis|EF157852|Galatheididae  
 Munidopsis lauensis|EF157853|Galatheididae  
 Munidopsis aries|DQ677691|Galatheididae

Munidopsis lauensis|E157032|Galatheidae  
Munidopsis lauensis|EF157853|Galatheidae  
Munidopsis aries|DQ677691|Galatheidae  
Munidopsis kensmithi|DQ677706|Galatheidae  
Munidopsis kensmithi|DQ677709|Galatheidae  
Munidopsis antonii|DQ677685|Galatheidae  
Munidopsis antonii|DQ677686|Galatheidae  
Munidopsis antonii|DQ677687|Galatheidae  
Munidopsis antonii|DQ677688|Galatheidae  
Munidopsis antonii|DQ677689|Galatheidae  
Munidopsis recta|DQ677697|Galatheidae  
Munidopsis recta|DQ677699|Galatheidae  
Munidopsis recta|DQ677700|Galatheidae  
Munidopsis recta|DQ677695|Galatheidae  
Munidopsis recta|DQ677696|Galatheidae  
Munidopsis recta|DQ677698|Galatheidae  
Munidopsis recta|DQ677701|Galatheidae  
Munidopsis recta|DQ677702|Galatheidae  
Munidopsis antonii|DQ677678|Galatheidae  
Munidopsis antonii|DQ677677|Galatheidae  
Munidopsis antonii|DQ677681|Galatheidae  
Munidopsis antonii|DQ677682|Galatheidae  
Munidopsis scotti|DQ677703|Galatheidae  
Munidopsis scotti|DQ677704|Galatheidae  
Munidopsis scotti|DQ677705|Galatheidae  
Munidopsis segonzaci|DQ677683|Galatheidae  
Munidopsis tiburon|DQ677673|Galatheidae  
Munidopsis cascadia|DQ677694|Galatheidae  
Munidopsis vrijenhoeki|DQ677675|Galatheidae  
Porcellana platycheles|JSDUK181|Porcellanidae  
Porcellana platycheles|JSDUK180|Porcellanidae  
Porcellana platycheles|JSDUK179|Porcellanidae  
Porcellana platycheles|JSDUK178|Porcellanidae  
Porcellana platycheles|JSDUK182|Porcellanidae  
Calocaris investigatoris|FC-URI13A|Calocarididae  
Calocaris investigatoris|FC-URI13B|Calocarididae  
Strigopagurus poupini|EU334658|Diogenidae  
Ciliopagurus hawaiiensis|EU334657|Diogenidae  
Ciliopagurus tricolor|EF683561|Diogenidae  
Ciliopagurus tricolor|EF683565|Diogenidae  
Ciliopagurus tricolor|EF683566|Diogenidae  
Ciliopagurus tricolor|EF683567|Diogenidae  
Ciliopagurus strigatus|EF683575|Diogenidae  
Ciliopagurus strigatus|EF683571|Diogenidae  
Ciliopagurus strigatus|EF683562|Diogenidae  
Ciliopagurus strigatus|EF683572|Diogenidae  
Ciliopagurus strigatus|EF683573|Diogenidae  
Ciliopagurus strigatus|EF683559|Diogenidae  
Ciliopagurus strigatus|EF683574|Diogenidae  
Ciliopagurus strigatus|EF683576|Diogenidae  
Ciliopagurus vakovako|EF683563|Diogenidae  
Ciliopagurus vakovako|EF683564|Diogenidae  
Dardanus arrosor|JSDAz217|Diogenidae  
Dardanus arrosor|JSDMe47|Diogenidae  
Dardanus arrosor|JSDMe48|Diogenidae  
Dardanus arrosor|FCFOP64-04|Diogenidae  
Dardanus arrosor|FCFOP64-02|Diogenidae  
Dardanus arrosor|FCFOPC045-19|Diogenidae  
Dardanus arrosor|JSDMe46|Diogenidae  
Dardanus arrosor|JSDMe49|Diogenidae  
Dardanus arrosor|JSDMe06|Diogenidae  
Dardanus arrosor|JSDMe51|Diogenidae  
Dardanus calidus|JSDAz207|Diogenidae  
Dardanus calidus|JSDAz208|Diogenidae  
Dardanus calidus|JSDAz47|Diogenidae  
Dardanus calidus|JSDAz46|Diogenidae  
Dardanus calidus|JSDAz48|Diogenidae  
Calcinus tubularis|JSDAz51|Diogenidae  
Calcinus tubularis|JSDAz64|Diogenidae  
Calcinus tubularis|JSDAz52|Diogenidae  
Calcinus tubularis|JSDAz66|Diogenidae  
Calcinus tubularis|JSDAz67|Diogenidae  
Dardanus lagopodes|EF683577|Diogenidae  
Paguristes turgidus|FC-VAF19A|Diogenidae  
Paguristes turgidus|FC-VAF42B|Diogenidae  
Paguristes turgidus|FC-VAF42C|Diogenidae  
Astacus astacus|AY667146|Astacidae  
Austropotamobius pallipes|AB443446|Astacidae  
Austropotamobius pallipes|AB443448|Astacidae  
Austropotamobius pallipes|AB443449|Astacidae  
Austropotamobius pallipes|AB443450|Astacidae  
Austropotamobius pallipes|AB443445|Astacidae  
Austropotamobius pallipes|AB443447|Astacidae  
Austropotamobius pallipes|AB443451|Astacidae  
Austropotamobius torrentium|AM180944|Astacidae  
Austropotamobius torrentium|AM180943|Astacidae  
Austropotamobius torrentium|AM180945|Astacidae  
Austropotamobius torrentium|AM180942|Astacidae  
Austropotamobius torrentium|AM180946|Astacidae  
Austropotamobius torrentium|AM180947|Astacidae  
Austropotamobius torrentium|AM180948|Astacidae  
Cambarus causeyi|DQ113443|Cambaridae  
Cambarus bartonii|EU583574|Cambaridae  
Cambarus bartonii|AY701190|Cambaridae  
Cambarus cryptodytes|DQ113444|Cambaridae  
Cambarus hamulatus|DQ411773|Cambaridae  
Cambarus hamulatus|DQ411770|Cambaridae  
Cambarus hamulatus|DQ411771|Cambaridae  
Cambarus hamulatus|DQ411774|Cambaridae

Cambarus hamulatus|DQ411770|Cambaridae  
 Cambarus hamulatus|DQ411771|Cambaridae  
 Cambarus hamulatus|DQ411774|Cambaridae  
 Cambarus hamulatus|DQ411768|Cambaridae  
 Cambarus hamulatus|DQ411772|Cambaridae  
 Cambarus hamulatus|DQ411769|Cambaridae  
 Cambarus hamulatus|DQ411767|Cambaridae  
 Cambarus hamulatus|DQ411760|Cambaridae  
 Cambarus hamulatus|DQ411776|Cambaridae  
 Cambarus jonesi|DQ411778|Cambaridae  
 Cambarus jonesi|DQ411777|Cambaridae  
 Cambarus jonesi|DQ411779|Cambaridae  
 Cambarus brachydactylus|DQ113442|Cambaridae  
 Cambarus brachydactylus|DQ411783|Cambaridae  
 Cambarus friaufi|DQ411784|Cambaridae  
 Cambarus friaufi|EF207160|Cambaridae  
 Cambarus gentryi|DQ411785|Cambaridae  
 Cambarus graysoni|AY701192|Cambaridae  
 Cambarus batchi|DQ113441|Cambaridae  
 Cambarus tenebrosus|EU583576|Cambaridae  
 Orconectes immunis|FC-DPD01|Cambaridae  
 Barbicambarus cornutus|DQ113440|Cambaridae  
 Orconectes limosus|FC-OLIM64|Cambaridae  
 Hobbseus valleculus|AY701193|Cambaridae  
 Procambarus acutus|AF474366|Cambaridae  
 Procambarus clarkii|AY701195|Cambaridae  
 Procambarus simulans|EU583575|Cambaridae  
 Parastacus brasiliensis|EF599158|Parastacidae  
 Parastacus pugnax|EF599157|Parastacidae  
 Callianassa kraussi|FJ644746|Callianassidae  
 Callianassa kraussi|FJ644727|Callianassidae  
 Callianassa kraussi|FJ644768|Callianassidae  
 Callianassa kraussi|FJ644730|Callianassidae  
 Callianassa kraussi|FJ644825|Callianassidae  
 Callianassa kraussi|FJ644771|Callianassidae  
 Callianassa kraussi|FJ644821|Callianassidae  
 Callianassa kraussi|FJ644839|Callianassidae  
 Callianassa kraussi|FJ644855|Callianassidae  
 Callianassa kraussi|FJ644859|Callianassidae  
 Hymenodora frontalis|FC-TEC11A|Oplophoridae  
 Systellaspis debilis|JSDPX42[05]-08|Oplophoridae  
 Systellaspis debilis|JSDPX42[05]-07|Oplophoridae  
 Systellaspis debilis|JSDPX42[05]-09|Oplophoridae  
 Vulcanocalliax arutyunovi|FCDPH12-399Gr4|Callianassidae  
 Scyllarus arctus|FJ174966|Scyllaridae  
 Scyllarus posteli|FJ174967|Scyllaridae  
 Scyllarus pygmaeus|FJ174965|Scyllaridae  
 Palinurus elephas|JSDA2229|Palinuridae  
 Palinurus elephas|JSDA2228|Palinuridae  
 Palinurus elephas|FJ174956|Palinuridae  
 Palinurus elephas|AJ889577|Palinuridae  
 Palinurus barbarae|FJ174960|Palinuridae  
 Palinurus gilchristi|FJ174961|Palinuridae  
 Palinurus charlestoni|FJ174959|Palinuridae  
 Palinurus delagoae|FJ174958|Palinuridae  
 Palinurus mauritanicus|FJ174957|Palinuridae  
 Palinurus mauritanicus|AJ889578|Palinuridae  
 Palibythus magnificus|FJ174955|Palinuridae  
 Panulirus japonicus|AB071201|Palinuridae  
 Panulirus japonicus|FJ174968|Palinuridae  
 Panulirus japonicus|NC\_004251|Palinuridae  
 Panulirus argus|FJ174969|Palinuridae  
 Panulirus argus|AF339452|Palinuridae  
 Panulirus guttatus|AF339456|Palinuridae  
 Panulirus cygnus|AF339453|Palinuridae  
 Panulirus marginatus|AF339465|Palinuridae  
 Panulirus pascuensis|AF339466|Palinuridae  
 Panulirus echinatus|AF339454|Palinuridae  
 Panulirus penicillatus|FJ174970|Palinuridae  
 Panulirus penicillatus|AF339468|Palinuridae  
 Panulirus polyphagus|AF339469|Palinuridae  
 Panulirus laevicauda|AF339462|Palinuridae  
 Panulirus gracilis|AF339455|Palinuridae  
 Panulirus inflatus|FJ174964|Palinuridae  
 Panulirus inflatus|AF339459|Palinuridae  
 Panulirus homarus|FJ174963|Palinuridae  
 Panulirus ornatus|AF339467|Palinuridae  
 Panulirus regius|FJ174962|Palinuridae  
 Panulirus regius|AF339470|Palinuridae  
 Panulirus stimpsoni|AF339471|Palinuridae  
 Panulirus versicolor|AB244283|Palinuridae  
 Panulirus versicolor|AF339472|Palinuridae  
 Jasus edwardsii|FJ174951|Palinuridae  
 Jasus edwardsii|AF339473|Palinuridae  
 Jasus verreauxi|FJ174952|Palinuridae  
 Jasus verreauxi|AF192883|Palinuridae  
 Projasus parkeri|FJ174953|Palinuridae  
 Thenus unimaculatus|FJ174950|Scyllaridae  
 Puerulus angulatus|FJ174954|Palinuridae  
 Metanephrops arafurensis|EU186143|Nephropidae  
 Metanephrops sibogae|EU186142|Nephropidae  
 Metanephrops boschmai|EU186141|Nephropidae  
 Metanephrops formosanus|EU186137|Nephropidae  
 Metanephrops sinensis|EU186138|Nephropidae  
 Metanephrops armatus|EU186136|Nephropidae  
 Metanephrops japonicus|EU186135|Nephropidae  
 Metanephrops mozambicus|EU186134|Nephropidae  
 Metanephrops andamanicus|EU186133|Nephropidae

Metanephrops japonicus|EU186135|Nephropidae  
 Metanephrops mozambicus|EU186134|Nephropidae  
 Metanephrops andamanicus|EU186133|Nephropidae  
 Metanephrops sagamiensis|EU186131|Nephropidae  
 Metanephrops velutinus|EU186132|Nephropidae  
 Homarus americanus|GSL31-11|Nephropidae  
 Homarus americanus|FJ174944|Nephropidae  
 Homarus americanus|GSL31-12|Nephropidae  
 Homarus americanus|GSL31-16|Nephropidae  
 Homarus americanus|HA01MD0106|Nephropidae  
 Homarus americanus|HA02MD0106|Nephropidae  
 Homarus gammarus|EU186145|Nephropidae  
 Nephrops norvegicus|FCDOPB090-02|Nephropidae  
 Nephrops norvegicus|FCDOPB090-03|Nephropidae  
 Nephrops norvegicus|FCFOPC041-09|Nephropidae  
 Nephrops norvegicus|FCFOPC041-08|Nephropidae  
 Nephrops norvegicus|FCDOPB090-04|Nephropidae  
 Nephrops norvegicus|FCFOPC041-07|Nephropidae  
 Nephrops norvegicus|FCFOPC041-06|Nephropidae  
 Nephrops norvegicus|FJ174945|Nephropidae  
 Nephropsis atlantica|JSDUKdeep\_18|Nephropidae  
 Nephropsis atlantica|JSDUKdeep\_19|Nephropidae  
 Nephropsis atlantica|JSDUKdeep\_20|Nephropidae  
 Cherax parvus|DQ006293|Parastacidae  
 Cherax quinquecarinatus|AF493618|Parastacidae  
 Cherax quinquecarinatus|AF493619|Parastacidae  
 Cherax quinquecarinatus|AF493620|Parastacidae  
 Cherax quinquecarinatus|AF493621|Parastacidae  
 Cherax crassimanus|AF493625|Parastacidae  
 Cherax preissii|EF118808|Parastacidae  
 Cherax preissii|EF118810|Parastacidae  
 Cherax preissii|EF118813|Parastacidae  
 Cherax preissii|EF118814|Parastacidae  
 Cherax preissii|EF118816|Parastacidae  
 Cherax preissii|AF493622|Parastacidae  
 Cherax preissii|EF118817|Parastacidae  
 Cherax preissii|EF118818|Parastacidae  
 Cherax preissii|EF118819|Parastacidae  
 Cherax preissii|EF118821|Parastacidae  
 Cherax tenuimanus|AF493629|Parastacidae  
 Cherax tenuimanus|AF493628|Parastacidae  
 Cherax tenuimanus|AF493626|Parastacidae  
 Cherax tenuimanus|AF493627|Parastacidae  
 Cherax tenuimanus|AF493630|Parastacidae  
 Cherax destructor|NC\_011243|Parastacidae  
 Cherax destructor|AY383557|Parastacidae  
 Cherax quadricarinatus|DQ006294|Parastacidae  
 Engaeus strictifrons|AF493633|Parastacidae  
 Geocharax falcata|AF493632|Parastacidae  
 Astacopsis gouldi|DQ006289|Parastacidae  
 Astacopsis tricornis|DQ006290|Parastacidae  
 Astacopsis tricornis|DQ006291|Parastacidae  
 Euastacus fleckeri|DQ006336|Parastacidae  
 Euastacus fleckeri|DQ006337|Parastacidae  
 Euastacus robertsi|DQ006373|Parastacidae  
 Euastacus robertsi|DQ006374|Parastacidae  
 Euastacus robertsi|DQ006370|Parastacidae  
 Euastacus robertsi|DQ006375|Parastacidae  
 Euastacus robertsi|DQ006376|Parastacidae  
 Euastacus robertsi|DQ006371|Parastacidae  
 Euastacus robertsi|DQ006372|Parastacidae  
 Euastacus robertsi|DQ006368|Parastacidae  
 Euastacus robertsi|DQ006369|Parastacidae  
 Euastacus robertsi|DQ006377|Parastacidae  
 Euastacus hystricosus|DQ006346|Parastacidae  
 Euastacus hystricosus|DQ006347|Parastacidae  
 Euastacus hystricosus|DQ006348|Parastacidae  
 Euastacus jagara|DQ006349|Parastacidae  
 Euastacus jagara|DQ006350|Parastacidae  
 Euastacus bindal|DQ006316|Parastacidae  
 Euastacus monteithorum|DQ006357|Parastacidae  
 Euastacus setosus|DQ006379|Parastacidae  
 Euastacus setosus|DQ006380|Parastacidae  
 Euastacus reductus|DQ006365|Parastacidae  
 Euastacus australasiensis|DQ006299|Parastacidae  
 Euastacus australasiensis|DQ006298|Parastacidae  
 Euastacus australasiensis|DQ006300|Parastacidae  
 Euastacus australasiensis|DQ006301|Parastacidae  
 Euastacus maidae|DQ006353|Parastacidae  
 Euastacus maidae|DQ006354|Parastacidae  
 Euastacus mirangudjin|DQ006355|Parastacidae  
 Euastacus mirangudjin|DQ006356|Parastacidae  
 Euastacus neohirsutus|DQ006358|Parastacidae  
 Euastacus neohirsutus|DQ006361|Parastacidae  
 Euastacus neohirsutus|DQ006362|Parastacidae  
 Euastacus sulcatus|DQ006391|Parastacidae  
 Euastacus sulcatus|DQ006394|Parastacidae  
 Euastacus sulcatus|DQ006392|Parastacidae  
 Euastacus sulcatus|DQ006393|Parastacidae  
 Euastacus sulcatus|DQ006396|Parastacidae  
 Euastacus gamilaroi|DQ006338|Parastacidae  
 Euastacus gamilaroi|DQ006339|Parastacidae  
 Euastacus clarkae|DQ006320|Parastacidae  
 Euastacus clarkae|DQ006321|Parastacidae  
 Euastacus polysetosus|DQ006363|Parastacidae  
 Euastacus polysetosus|DQ006364|Parastacidae  
 Euastacus suttoni|DQ006397|Parastacidae  
 Euastacus suttoni|DQ006398|Parastacidae  
 Euastacus suttoni|DQ006399|Parastacidae

Euastacus suttoni|DQ006397|Parastacidae  
 Euastacus suttoni|DQ006398|Parastacidae  
 Euastacus gumar|DQ006340|Parastacidae  
 Euastacus gumar|DQ006341|Parastacidae  
 Euastacus dangadi|DQ006327|Parastacidae  
 Euastacus dangadi|DQ006328|Parastacidae  
 Euastacus valentulus|DQ006401|Parastacidae  
 Euastacus valentulus|DQ006402|Parastacidae  
 Euastacus diversus|DQ006331|Parastacidae  
 Euastacus diversus|DQ006332|Parastacidae  
 Euastacus crassus|DQ006324|Parastacidae  
 Euastacus crassus|DQ006326|Parastacidae  
 Euastacus rieki|DQ006366|Parastacidae  
 Euastacus rieki|DQ006367|Parastacidae  
 Euastacus kershawi|DQ006351|Parastacidae  
 Euastacus kershawi|DQ006352|Parastacidae  
 Euastacus woiwuru|DQ006403|Parastacidae  
 Euastacus woiwuru|DQ006404|Parastacidae  
 Euastacus dharawalus|AY380480|Parastacidae  
 Euastacus dharawalus|DQ006329|Parastacidae  
 Euastacus dharawalus|DQ006330|Parastacidae  
 Euastacus brachythorax|DQ006318|Parastacidae  
 Euastacus brachythorax|DQ006319|Parastacidae  
 Euastacus claytoni|AY380479|Parastacidae  
 Euastacus claytoni|DQ006322|Parastacidae  
 Euastacus claytoni|DQ006323|Parastacidae  
 Euastacus guwinus|DQ006343|Parastacidae  
 Euastacus guwinus|DQ006345|Parastacidae  
 Euastacus guwinus|DQ006342|Parastacidae  
 Euastacus guwinus|DQ006344|Parastacidae  
 Euastacus yanga|DQ006408|Parastacidae  
 Euastacus yanga|DQ006406|Parastacidae  
 Euastacus yanga|DQ006405|Parastacidae  
 Euastacus yanga|DQ006407|Parastacidae  
 Euastacus yanga|DQ006409|Parastacidae  
 Euastacus spinifer|DQ006386|Parastacidae  
 Euastacus spinifer|DQ006389|Parastacidae  
 Euastacus spinifer|DQ006385|Parastacidae  
 Euastacus spinifer|DQ006388|Parastacidae  
 Euastacus spinifer|DQ006387|Parastacidae  
 Euastacus spinifer|DQ006390|Parastacidae  
 Euastacus armatus|DQ006295|Parastacidae  
 Euastacus armatus|DQ006296|Parastacidae  
 Euastacus armatus|DQ006297|Parastacidae  
 Euastacus crassus|DQ006325|Parastacidae  
 Euastacus bispinosus|AF493634|Parastacidae  
 Euastacus bispinosus|DQ006317|Parastacidae  
 Euastacus yarraensis|DQ006410|Parastacidae  
 Euastacus yarraensis|DQ006411|Parastacidae  
 Euastacus yarraensis|DQ006412|Parastacidae  
 Euastacus balanensis|DQ006303|Parastacidae  
 Euastacus balanensis|DQ006302|Parastacidae  
 Euastacus balanensis|DQ006305|Parastacidae  
 Euastacus balanensis|DQ006309|Parastacidae  
 Euastacus balanensis|DQ006304|Parastacidae  
 Euastacus balanensis|DQ006306|Parastacidae  
 Euastacus balanensis|DQ006307|Parastacidae  
 Euastacus balanensis|DQ006308|Parastacidae  
 Euastacus balanensis|DQ006311|Parastacidae  
 Euastacus balanensis|DQ006312|Parastacidae  
 Euastacus yigara|DQ006413|Parastacidae  
 Euastacus yigara|DQ006414|Parastacidae  
 Paranephrops planifrons|DQ394241|Parastacidae  
 Paranephrops planifrons|DQ394184|Parastacidae  
 Paranephrops planifrons|DQ394235|Parastacidae  
 Paranephrops planifrons|DQ394219|Parastacidae  
 Paranephrops planifrons|EF680493|Parastacidae  
 Paranephrops planifrons|EF680490|Parastacidae  
 Paranephrops planifrons|EF680491|Parastacidae  
 Paranephrops planifrons|DQ394182|Parastacidae  
 Paranephrops planifrons|EF680488|Parastacidae  
 Paranephrops planifrons|EF680497|Parastacidae  
 Paranephrops zealandicus|DQ394250|Parastacidae  
 Paranephrops zealandicus|DQ394254|Parastacidae  
 Paranephrops zealandicus|DQ394268|Parastacidae  
 Paranephrops zealandicus|DQ394269|Parastacidae  
 Paranephrops zealandicus|DQ006417|Parastacidae  
 Paranephrops zealandicus|DQ394270|Parastacidae  
 Paranephrops zealandicus|DQ394273|Parastacidae  
 Paranephrops zealandicus|DQ394277|Parastacidae  
 Paranephrops zealandicus|DQ394223|Parastacidae  
 Paranephrops zealandicus|DQ394282|Parastacidae  
 Samastacus spinifrons|EF599160|Parastacidae  
 Virilastacus retamali|EF599154|Parastacidae  
 Virilastacus retamali|EF599155|Parastacidae  
 Virilastacus rucaphuelensis|EF599150|Parastacidae  
 Periclimenes soror|FJ386124|Palaemonidae  
 Periclimenes soror|FJ386233|Palaemonidae  
 Periclimenes soror|FJ386189|Palaemonidae  
 Periclimenes soror|FJ386153|Palaemonidae  
 Periclimenes soror|FJ386174|Palaemonidae  
 Periclimenes soror|FJ386141|Palaemonidae  
 Periclimenes soror|FJ386204|Palaemonidae  
 Periclimenes soror|FJ386217|Palaemonidae  
 Periclimenes soror|FJ386214|Palaemonidae  
 Periclimenes soror|FJ386264|Palaemonidae  
 Periclimenes lamellibrachiophilus|AB470722|Palaemonidae  
 Periclimenes lamellibrachiophilus|AB470720|Palaemonidae



Periclimenes soror|FJ386264|Palaemonidae  
 Periclimenes lamellibrachiophilus|AB470722|Palaemonidae  
 Periclimenes lamellibrachiophilus|AB470720|Palaemonidae  
 Periclimenes lamellibrachiophilus|AB470727|Palaemonidae  
 Periclimenes lamellibrachiophilus|AB470730|Palaemonidae  
 Periclimenes thermohydrophilus|AB298106|Palaemonidae  
 Periclimenes thermohydrophilus|AB298107|Palaemonidae  
 Periclimenes thermohydrophilus|AB298102|Palaemonidae  
 Periclimenes thermohydrophilus|AB298103|Palaemonidae  
 Periclimenes thermohydrophilus|AB298104|Palaemonidae  
 Periclimenes thermohydrophilus|AB298105|Palaemonidae  
 Scyllarides herklotsii|FJ174946|Scyllaridae  
 Scyllarides latus|JSDAz240|Scyllaridae  
 Scyllarides latus|FJ174947|Scyllaridae  
 Scyllarides latus|JSDAz236|Scyllaridae  
 Scyllarides latus|JSDAz235|Scyllaridae  
 Scyllarides latus|JSDAz36|Scyllaridae  
 Scyllarides latus|JSDAz37|Scyllaridae  
 Sergestes similis|FC-TPD17A|Sergestidae  
 Sergestes similis|FC-TPD17B|Sergestidae  
 Sergestes similis|FC-TPD17C|Sergestidae  
 Sergestes similis|FC-TPD17D|Sergestidae  
 Sergia robusta|JSDPX71-01|Sergestidae  
 Sergia robusta|JSDPX4-02|Sergestidae  
 Sergia robusta|JSDPX4-03|Sergestidae  
 Sergia robusta|FCFOPC069-03|Sergestidae  
 Sergia robusta|JSDPX79-05|Sergestidae  
 Sergia robusta|JSDUKdeep\_21|Sergestidae  
 Sergia robusta|JSDUKdeep\_22|Sergestidae  
 Sergia robusta|JSDUKdeep\_23|Sergestidae  
 Funchalia villose|JSDPX42[05]-01|Penaeidae  
 Marsupenaeus japonicus|NC\_007010|Penaeidae  
 Marsupenaeus japonicus|AF006346|Penaeidae  
 Marsupenaeus japonicus|AY787755|Penaeidae  
 Melicertus kerathurus|JSDPX23-01|Penaeidae  
 Melicertus kerathurus|EF219326|Penaeidae  
 Melicertus kerathurus|EF219324|Penaeidae  
 Melicertus kerathurus|JSDPX23-03|Penaeidae  
 Melicertus kerathurus|EF219290|Penaeidae  
 Melicertus kerathurus|EF219289|Penaeidae  
 Melicertus kerathurus|EF219291|Penaeidae  
 Melicertus kerathurus|EF219308|Penaeidae  
 Melicertus kerathurus|EF219309|Penaeidae  
 Melicertus kerathurus|EF219342|Penaeidae  
 Farfantepenaeus notialis|X84350 X84351 X84352 X84353 X84354 X84355 X84356 X84357|Penaeidae  
 Farfantepenaeus notialis|X84350 X84351 X84352 X84353 X84354 X84355 X84356 X84357|Penaeidae  
 Farfantepenaeus notialis|X84350|Penaeidae  
 Litopenaeus stylirostris|EU517503|Penaeidae  
 Litopenaeus stylirostris|NC\_012060|Penaeidae  
 Litopenaeus vannamei|DQ534543|Penaeidae  
 Fenneropenaeus chinensis|NC\_009679|Penaeidae  
 Fenneropenaeus chinensis|DQ518969|Penaeidae  
 Fenneropenaeus chinensis|DQ656600|Penaeidae  
 Penaeus monodon|NC\_002184|Penaeidae  
 Penaeus monodon|AF217843|Penaeidae  
 Parapenaeus longirostris|FCFOPC042-06|Penaeidae  
 Parapenaeus longirostris|JSDMe37|Penaeidae  
 Parapenaeus longirostris|JSDMe38|Penaeidae  
 Peneopsis serrata|FCFOPC050-01|Penaeidae  
 Hymenopenaeus debilis|JSDPX40-01|Solenoceridae  
 Hymenopenaeus debilis|JSDPX39-02|Solenoceridae  
 Hymenopenaeus debilis|JSDPX42[05]-04|Solenoceridae  
 Hymenopenaeus debilis|JSDPX42[05]-05|Solenoceridae  
 Hymenopenaeus debilis|JSDPX39-01|Solenoceridae  
 Hymenopenaeus debilis|JSDPX42[05]-06|Solenoceridae  
 Solenocera membranacea|JSDMe19|Solenoceridae  
 Solenocera membranacea|FCFOPC041-14|Solenoceridae  
 Solenocera membranacea|FCFOPC041-13|Solenoceridae  
 Solenocera membranacea|FCFOP66-11|Solenoceridae  
 Solenocera membranacea|FCDOPB089-03|Solenoceridae  
 Solenocera membranacea|FCDOPB089-02|Solenoceridae  
 Solenocera membranacea|FCDOPB083-07|Solenoceridae  
 Solenocera membranacea|FCFOPC041-12|Solenoceridae  
 Solenocera membranacea|JSDMe20|Solenoceridae  
 Solenocera membranacea|JSDMe21|Solenoceridae  
 Dichelopandalus bonnieri|JSDUKdeep\_51|Pandalidae  
 Dichelopandalus bonnieri|JSDUKdeep\_53|Pandalidae  
 Pontocaris lacazei|FCFOPC041-51|Crangonidae  
 Pontocaris lacazei|FCDPH15-575B51|Crangonidae  
 Pontocaris lacazei|FCFOPC044-07|Crangonidae  
 Pontocaris lacazei|FCFOPC044-08|Crangonidae  
 Pontocaris lacazei|FCFOPC044-09|Crangonidae  
 Crangon alaskensis|FC-SIC201A|Crangonidae  
 Crangon alaskensis|FC-SIC201B|Crangonidae  
 Crangon septemspinosa|L210AR4-05|Crangonidae  
 Crangon septemspinosa|L37AR1-01|Crangonidae  
 Crangon septemspinosa|L175AR1-02|Crangonidae  
 Crangon septemspinosa|L154AR1-04|Crangonidae  
 Crangon septemspinosa|L51AR1-01|Crangonidae  
 Crangon septemspinosa|L184AR1-07|Crangonidae  
 Crangon septemspinosa|L187AR1-05|Crangonidae  
 Crangon septemspinosa|L210AR4-06|Crangonidae  
 Crangon septemspinosa|L42AR1-01|Crangonidae  
 Crangon septemspinosa|CS02SL0106|Crangonidae  
 Argis lar|FC-SFF12A|Crangonidae  
 Argis lar|FC-SFF21A|Crangonidae  
 Crangon abyssorum|FC-SIB14A|Crangonidae  
 Crangon abyssorum|FC-SIB14B|Crangonidae

Argis latifrons|FC-SFFZ1A|Crangonidae  
 Crangon abyssorum|FC-SIB14A|Crangonidae  
 Crangon abyssorum|FC-SIB14B|Crangonidae  
 Crangon communis|FC-SID122|Crangonidae  
 Crangon communis|FC-SID8A|Crangonidae  
 Argis alaskensis|FC-SFC163B|Crangonidae  
 Argis alaskensis|FC-SFC163A|Crangonidae  
 Argis alaskensis|FC-SFC29A|Crangonidae  
 Argis dentata|AD01CN0406|Crangonidae  
 Argis dentata|GSL31-46|Crangonidae  
 Argis dentata|AD03CN0406|Crangonidae  
 Argis dentata|TE-004T141-160-09|Crangonidae  
 Argis dentata|TE-004T21-40-07|Crangonidae  
 Sclerocrangon boreas|BSM08-16|Crangonidae  
 Sclerocrangon boreas|FC-DPA11|Crangonidae  
 Sclerocrangon boreas|FC-DPA13|Crangonidae  
 Sclerocrangon boreas|BSM08-07|Crangonidae  
 Sclerocrangon boreas|BSM08-72|Crangonidae  
 Sclerocrangon boreas|BSM08-39|Crangonidae  
 Sclerocrangon boreas|FC-DPA05|Crangonidae  
 Sclerocrangon boreas|FC-DPA07|Crangonidae  
 Sclerocrangon boreas|BSM08-01|Crangonidae  
 Sclerocrangon boreas|BSM08-88|Crangonidae  
 Palaemon elegans|FC-DPBAS02A|Palaemonidae  
 Palaemon elegans|FC-DPBAS02B|Palaemonidae  
 Palaemon elegans|FC-DPBAS02C|Palaemonidae  
 Palaemon elegans|FC-DPBAS02E|Palaemonidae  
 Palaemon elegans|JSDUK163|Palaemonidae  
 Palaemon elegans|JSDUK162|Palaemonidae  
 Palaemon elegans|JSDUK161|Palaemonidae  
 Palaemon elegans|JSDAZ186|Palaemonidae  
 Palaemon elegans|JSDUK164|Palaemonidae  
 Palaemon longirostris|AJ640121|Palaemonidae  
 Palaemon longirostris|AJ640116|Palaemonidae  
 Palaemon longirostris|AJ640120|Palaemonidae  
 Palaemon longirostris|AJ640115|Palaemonidae  
 Palaemon longirostris|AJ640117|Palaemonidae  
 Palaemon longirostris|AJ640118|Palaemonidae  
 Palaemon longirostris|AJ640119|Palaemonidae  
 Palaemon longirostris|AJ640122|Palaemonidae  
 Palaemon longirostris|AJ640123|Palaemonidae  
 Palaemon longirostris|AJ640124|Palaemonidae  
 Palaemon serratus|JSDUK165|Palaemonidae  
 Palaemon serratus|FCDOPB088-13|Palaemonidae  
 Palaemon serratus|JSDUK166|Palaemonidae  
 Palaemon serratus|FCDOPB088-14|Palaemonidae  
 Palaemon serratus|JSDUK167|Palaemonidae  
 Exopalaemon carinicauda|NC\_012566|Palaemonidae  
 Exopalaemon carinicauda|EF560650|Palaemonidae  
 Exopalaemon styliferus|FM958057|Palaemonidae  
 Palaemon debilis|FM958086|Palaemonidae  
 Palaemonetes vulgaris|L169AR3-02|Palaemonidae  
 Palaemonetes vulgaris|L169AR3-01|Palaemonidae  
 Palaemonetes vulgaris|L169AR3-03|Palaemonidae  
 Palaemonetes vulgaris|L72AR1-02|Palaemonidae  
 Palaemonetes vulgaris|L72AR1-07|Palaemonidae  
 Palaemonetes vulgaris|L72AR1-09|Palaemonidae  
 Macrobrachium lanchesteri|FJ797435|Palaemonidae  
 Macrobrachium lanchesteri|NC\_012217|Palaemonidae  
 Macrobrachium clymene|FM958062|Palaemonidae  
 Macrobrachium callirrhoe|FM958060|Palaemonidae  
 Macrobrachium equidens|FM958063|Palaemonidae  
 Macrobrachium mammillodactylus|FM958075|Palaemonidae  
 Macrobrachium asperulum|FM958058|Palaemonidae  
 Macrobrachium asperulum|AB250546|Palaemonidae  
 Macrobrachium asperulum|AB250510|Palaemonidae  
 Macrobrachium pinguis|FM958087|Palaemonidae  
 Macrobrachium shokitai|FM958082|Palaemonidae  
 Macrobrachium gracilirostre|FM958066|Palaemonidae  
 Macrobrachium horstii|FM958069|Palaemonidae  
 Macrobrachium jaroense|FM958071|Palaemonidae  
 Macrobrachium placidum|FM958078|Palaemonidae  
 Macrobrachium hainanense|FM958068|Palaemonidae  
 Macrobrachium nipponense|DQ859911|Palaemonidae  
 Macrobrachium nipponense|DQ859910|Palaemonidae  
 Macrobrachium nipponense|FM958077|Palaemonidae  
 Macrobrachium nipponense|DQ859917|Palaemonidae  
 Macrobrachium nipponense|DQ990459|Palaemonidae  
 Macrobrachium nipponense|DQ859907|Palaemonidae  
 Macrobrachium nipponense|EF076647|Palaemonidae  
 Macrobrachium nipponense|DQ859909|Palaemonidae  
 Macrobrachium nipponense|DQ859918|Palaemonidae  
 Macrobrachium nipponense|EF076648|Palaemonidae  
 Macrobrachium saigonense|FM958080|Palaemonidae  
 Macrobrachium sintangense|FM958083|Palaemonidae  
 Macrobrachium niphanense|FM958076|Palaemonidae  
 Macrobrachium lanatum|FM958081|Palaemonidae  
 Macrobrachium esculentum|FM958064|Palaemonidae  
 Macrobrachium faustinum|EU005025|Palaemonidae  
 Macrobrachium faustinum|EU005003|Palaemonidae  
 Macrobrachium faustinum|EU005015|Palaemonidae  
 Macrobrachium faustinum|EU005029|Palaemonidae  
 Macrobrachium faustinum|EU005019|Palaemonidae  
 Macrobrachium faustinum|EU005023|Palaemonidae  
 Macrobrachium faustinum|EU005014|Palaemonidae  
 Macrobrachium faustinum|EU005033|Palaemonidae  
 Macrobrachium faustinum|EU005007|Palaemonidae  
 Macrobrachium faustinum|EU005034|Palaemonidae  
 Macrobrachium fukienense|FM958065|Palaemonidae

Macrobrachium faustinum|EU005007|Palaemonidae  
 Macrobrachium faustinum|EU005034|Palaemonidae  
 Macrobrachium fukienense|FM958065|Palaemonidae  
 Macrobrachium idae|FM958070|Palaemonidae  
 Macrobrachium rosenbergii|FM958079|Palaemonidae  
 Macrobrachium rosenbergii|FJ171913|Palaemonidae  
 Macrobrachium rosenbergii|NC\_006880|Palaemonidae  
 Macrobrachium rosenbergii|AY659990|Palaemonidae  
 Macrobrachium malayanum|FM958074|Palaemonidae  
 Macrobrachium trompii|FM958084|Palaemonidae  
 Processa modica|FCFOPC041-40|Processidae  
 Processa modica|FCFOPC041-42|Processidae  
 Processa modica|JSDPX41-14|Processidae  
 Processa modica|FCFOPC041-41|Processidae  
 Processa modica|JSDPX41-15|Processidae  
 Lysmata pedersenii|EU135868|Hippolytidae  
 Lysmata pedersenii|EU135869|Hippolytidae  
 Lysmata wurdemanni|EU135835|Hippolytidae  
 Lysmata wurdemanni|EU135842|Hippolytidae  
 Lysmata wurdemanni|EU135853|Hippolytidae  
 Lysmata wurdemanni|EU135854|Hippolytidae  
 Lysmata wurdemanni|EU135863|Hippolytidae  
 Lysmata wurdemanni|EU135862|Hippolytidae  
 Lysmata wurdemanni|EU135860|Hippolytidae  
 Lysmata wurdemanni|EU135864|Hippolytidae  
 Lysmata wurdemanni|EU135865|Hippolytidae  
 Lysmata wurdemanni|EU135867|Hippolytidae  
 Sabinea hystrix|JSDUKdeep\_07|Crangonidae  
 Sabinea hystrix|JSDUKdeep\_06|Crangonidae  
 Sabinea hystrix|JSDUKdeep\_08|Crangonidae  
 Sabinea sarsii|TE-004T21-40-08|Crangonidae  
 Sabinea sarsii|TE-004T21-40-09|Crangonidae  
 Sabinea septemcarinata|GSL31-31|Crangonidae  
 Sabinea septemcarinata|GSL31-29|Crangonidae  
 Sabinea septemcarinata|GSL31-30|Crangonidae  
 Sabinea septemcarinata|SSC01CN0406|Crangonidae  
 Sabinea septemcarinata|SSC02CN0406|Crangonidae  
 Thoralus cranchii|JSDUK183|Hippolytidae  
 Thoralus cranchii|JSDUK184|Hippolytidae  
 Thoralus cranchii|JSDUK185|Hippolytidae  
 Trogllocaris anophthalmus|FJ425952|Atyidae  
 Trogllocaris anophthalmus|FJ425939|Atyidae  
 Trogllocaris anophthalmus|FJ425966|Atyidae  
 Trogllocaris anophthalmus|FJ425992|Atyidae  
 Trogllocaris anophthalmus|FJ426037|Atyidae  
 Trogllocaris anophthalmus|FJ425933|Atyidae  
 Trogllocaris anophthalmus|FJ425980|Atyidae  
 Trogllocaris anophthalmus|FJ426016|Atyidae  
 Trogllocaris anophthalmus|FJ426040|Atyidae  
 Trogllocaris anophthalmus|DQ320041|Atyidae  
 Trogllocaris bosnica|FJ426027|Atyidae  
 Trogllocaris bosnica|FJ426028|Atyidae  
 Trogllocaris kutaissiana|DQ320045|Atyidae  
 Trogllocaris hercegovinensis|DQ320044|Atyidae  
 Typhlatya pretneri|DQ641556|Atyidae  
 Caridina cantonensis|AB300190|Atyidae  
 Caridina formosae|AB300189|Atyidae  
 Neocaridina denticulata|AB300183|Atyidae  
 Neocaridina denticulata|AB300184|Atyidae  
 Neocaridina denticulata|AB300185|Atyidae  
 Neocaridina denticulata|AB300186|Atyidae  
 Neocaridina denticulata|AB300187|Atyidae  
 Neocaridina ketagalan|AB300180|Atyidae  
 Neocaridina ketagalan|AB300181|Atyidae  
 Neocaridina ketagalan|AB300182|Atyidae  
 Neocaridina saccam|AB300178|Atyidae  
 Neocaridina saccam|AB300177|Atyidae  
 Neocaridina saccam|AB300179|Atyidae  
 Stygiocaris lancifera|EU123823|Atyidae  
 Stygiocaris lancifera|EU123824|Atyidae  
 Stygiocaris lancifera|EU123825|Atyidae  
 Stygiocaris lancifera|EU123826|Atyidae  
 Stygiocaris styliifera|EU123814|Atyidae  
 Stygiocaris styliifera|EU123815|Atyidae  
 Stygiocaris styliifera|EU123816|Atyidae  
 Stygiocaris styliifera|EU123817|Atyidae  
 Stygiocaris styliifera|EU123818|Atyidae  
 Dugastella valentina|DQ641569|Atyidae  
 Trogllocaris inermis|DQ320046|Atyidae  
 Halocaridinides trigonophthalma|EF173838|Atyidae  
 Halocaridinides trigonophthalma|EF173839|Atyidae  
 Halocaridinides trigonophthalma|EF173840|Atyidae  
 Halocaridinides trigonophthalma|EF173841|Atyidae  
 Halocaridinides trigonophthalma|EF173842|Atyidae  
 Atyaephyra desmarestii|DQ320047|Atyidae  
 Halocaridina rubra|EF173793|Atyidae  
 Halocaridina rubra|EF173797|Atyidae  
 Halocaridina rubra|DQ399199|Atyidae  
 Halocaridina rubra|DQ399178|Atyidae  
 Halocaridina rubra|DQ399207|Atyidae  
 Halocaridina rubra|DQ399211|Atyidae  
 Halocaridina rubra|DQ399246|Atyidae  
 Halocaridina rubra|EF173809|Atyidae  
 Halocaridina rubra|EF173828|Atyidae  
 Halocaridina rubra|EF173831|Atyidae  
 Atya innocous|EU005043|Atyidae  
 Atya innocous|EU005046|Atyidae  
 Atya innocous|EU005038|Atyidae

Atya innocous|EU005043|Atyidae  
 Atya innocous|EU005046|Atyidae  
 Atya innocous|EU005038|Atyidae  
 Atya innocous|EU005047|Atyidae  
 Atya innocous|EU005039|Atyidae  
 Atya innocous|EU005036|Atyidae  
 Atya innocous|EU005037|Atyidae  
 Atya innocous|EU005041|Atyidae  
 Atya innocous|EU005040|Atyidae  
 Atya innocous|EU005048|Atyidae  
 Atya lanipes|EU005074|Atyidae  
 Atya lanipes|EU005072|Atyidae  
 Atya lanipes|EU005056|Atyidae  
 Atya lanipes|EU005075|Atyidae  
 Atya lanipes|EU005063|Atyidae  
 Atya lanipes|EU005069|Atyidae  
 Atya lanipes|EU005057|Atyidae  
 Atya lanipes|EU005054|Atyidae  
 Atya lanipes|EU005080|Atyidae  
 Atya lanipes|EU005082|Atyidae  
 Xiphocaris elongata|EU004996|Xiphocarididae  
 Xiphocaris elongata|EU004941|Xiphocarididae  
 Xiphocaris elongata|EU004942|Xiphocarididae  
 Xiphocaris elongata|EU004971|Xiphocarididae  
 Xiphocaris elongata|EU004972|Xiphocarididae  
 Xiphocaris elongata|EU004980|Xiphocarididae  
 Xiphocaris elongata|EU004944|Xiphocarididae  
 Xiphocaris elongata|EU004987|Xiphocarididae  
 Xiphocaris elongata|EU004990|Xiphocarididae  
 Xiphocaris elongata|EU004999|Xiphocarididae  
 Aristaemorpha foliacea|FCFOPC055-05|Aristeidae  
 Aristaemorpha foliacea|FCFOPC066-02|Aristeidae  
 Aristaemorpha foliacea|JSDMe33|Aristeidae  
 Aristaemorpha foliacea|JSDMe36|Aristeidae  
 Aristaemorpha foliacea|JSDMe35|Aristeidae  
 Aristaemorpha foliacea|JSDPXA40-01|Aristeidae  
 Athanas nitescens|JSDUK04|Alpheidae  
 Athanas nitescens|JSDUK05|Alpheidae  
 Athanas nitescens|JSDUK03|Alpheidae  
 Athanas nitescens|JSDUK06|Alpheidae  
 Athanas nitescens|JSDUK07|Alpheidae  
 Eualus avinus|FC-SQB213B|Hippolytidae  
 Eualus avinus|FC-SQB213A|Hippolytidae  
 Eualus avinus|FC-SQB213C|Hippolytidae  
 Eualus macilentus|TE-004T141-160-05|Hippolytidae  
 Eualus macilentus|EM01CN0606|Hippolytidae  
 Eualus macilentus|TE-004T21-40-06|Hippolytidae  
 Eualus macilentus|BSM07T11-04|Hippolytidae  
 Eualus macilentus|BSM07T11-05|Hippolytidae  
 Eualus macilentus|EM02CN0606|Hippolytidae  
 Eualus barbatus|FC-SQC9B|Hippolytidae  
 Eualus barbatus|FC-SQC9C|Hippolytidae  
 Eualus fabricii|L90AR12-01|Hippolytidae  
 Eualus fabricii|BSM07T1-23|Hippolytidae  
 Eualus gaimardi|FC-DPA12|Hippolytidae  
 Eualus gaimardi|JSDSv17|Hippolytidae  
 Eualus biunguis|FC-SQE11A|Hippolytidae  
 Eualus biunguis|FC-SQE11B|Hippolytidae  
 Eualus biunguis|FC-SQE13A|Hippolytidae  
 Eualus biunguis|FC-SQE13b|Hippolytidae  
 Lebbeus groenlandicus|FC-SPE26A|Hippolytidae  
 Lebbeus groenlandicus|FC-SPE26B|Hippolytidae  
 Lebbeus groenlandicus|TE-004T141-160-02|Hippolytidae  
 Eualus suckleyi|FC-SQJ242A|Hippolytidae  
 Eualus suckleyi|FC-SQJ242B|Hippolytidae  
 Eualus suckleyi|FC-SQJ39|Hippolytidae  
 Lebbeus polaris|LP01CN0406|Hippolytidae  
 Lebbeus polaris|TE-004T181-200-02|Hippolytidae  
 Spirontocaris lamellicornis|FC-SND7A|Hippolytidae  
 Spirontocaris lamellicornis|FC-SND7B|Hippolytidae  
 Spirontocaris holmesi|FC-SNC203A|Hippolytidae  
 Spirontocaris holmesi|FC-SNC72A|Hippolytidae  
 Spirontocaris sica|FC-SNI216A|Hippolytidae  
 Spirontocaris sica|FC-SNI216B|Hippolytidae  
 Spirontocaris sica|FC-SNI216C|Hippolytidae  
 Spirontocaris phippsi|FC-DPA02|Hippolytidae  
 Spirontocaris phippsi|FC-DPA09|Hippolytidae  
 Spirontocaris lilljeborgii|TE-004T201-220-01|Hippolytidae  
 Spirontocaris lilljeborgii|TE-004T69-04|Hippolytidae  
 Spirontocaris spinus|TE-004T141-160-01|Hippolytidae  
 Spirontocaris spinus|FC-DPA10|Hippolytidae  
 Spirontocaris spinus|GSL31-34|Hippolytidae  
 Spirontocaris spinus|BSM07T11-02|Hippolytidae  
 Spirontocaris spinus|GSL31-32|Hippolytidae  
 Spirontocaris spinus|GSL31-33|Hippolytidae  
 Spirontocaris spinus|GSL31-26|Hippolytidae  
 Spirontocaris spinus|BSM07T11-03|Hippolytidae  
 Plesionika acanthonotus|FCFOPC057-05|Pandalidae  
 Plesionika acanthonotus|JSDPX41-12|Pandalidae  
 Plesionika acanthonotus|JSDPX41-13|Pandalidae  
 Plesionika edwardsii|JSDMe71|Pandalidae  
 Plesionika edwardsii|JSDMe70|Pandalidae  
 Plesionika edwardsii|JSDMe73|Pandalidae  
 Plesionika edwardsii|JSDMe74|Pandalidae  
 Plesionika ensis|AY612869|Pandalidae  
 Alpheus glaber|FCFOPC043-05|Alpheidae  
 Alpheus glaber|FCFOPC044-05|Alpheidae  
 Alpheus glaber|FCFOPC047-03|Alpheidae  
 Plesionika acanthonotus|FCFOPC041-46|Pandalidae

Alpheus glaber|FCFOPC044-05|Alpheidae  
 Alpheus glaber|FCFOPC047-03|Alpheidae  
 Plesionika martia|FCFOPC041-46|Pandalidae  
 Plesionika martia|FCFOPC042-08|Pandalidae  
 Plesionika martia|FCFOPC042-10|Pandalidae  
 Plesionika martia|FCFOPC042-07|Pandalidae  
 Plesionika martia|FCFOPC043-04|Pandalidae  
 Plesionika martia|FCFOPC041-45|Pandalidae  
 Plesionika martia|FCFOPC041-47|Pandalidae  
 Plesionika martia|FCFOPC047-10|Pandalidae  
 Plesionika martia|FCFOPC047-11|Pandalidae  
 Pontophilus norvegicus|TE-004T1-20-18|Crangonidae  
 Pontophilus norvegicus|TE-004T21-40-02|Crangonidae  
 Pandalus borealis|PB02CN0406|Pandalidae  
 Pandalus borealis|PB01CN0406|Pandalidae  
 Pandalus borealis|TE005-T164-01|Pandalidae  
 Pandalus borealis|TE005-T187-01|Pandalidae  
 Pandalus jordani|FC-SDB122|Pandalidae  
 Pandalus jordani|FC-SDB122B|Pandalidae  
 Pandalus jordani|FC-SDB16A|Pandalidae  
 Pandalus jordani|FC-SDB1A|Pandalidae  
 Pandalus goniurus|FC-SCH2|Pandalidae  
 Pandalus montagui|JSDUK171|Pandalidae  
 Pandalus montagui|TE-004T1-20-11|Pandalidae  
 Pandalus montagui|GSL31-52|Pandalidae  
 Pandalus montagui|GSL31-13|Pandalidae  
 Pandalus montagui|PM01CN0406|Pandalidae  
 Pandalus montagui|PM02CN0406|Pandalidae  
 Pandalus montagui|TE-004T1-20-02|Pandalidae  
 Pandalus montagui|TE-004T1-20-03|Pandalidae  
 Pandalus montagui|TE-004T1-20-06|Pandalidae  
 Pandalus montagui|TE-004T141-160-03|Pandalidae  
 Pandalus montagui tridens|FC-SDD39A|Pandalidae  
 Pandalus montagui tridens|FC-SDD39B|Pandalidae  
 Pandalus montagui tridens|FC-SDD8|Pandalidae  
 Pandalopsis dispar|FC-SEE13B|Pandalidae  
 Pandalopsis dispar|FC-SEE13C|Pandalidae  
 Pandalopsis dispar|FC-SEE13E|Pandalidae  
 Pandalus danae|FC-SCF201B|Pandalidae  
 Pandalus danae|FC-SCF201C|Pandalidae  
 Pandalus danae|FC-SCF201A|Pandalidae  
 Pandalus danae|FC-SCF26|Pandalidae  
 Pandalus hypsinotus|FC-SCJ2|Pandalidae  
 Pandalus hypsinotus|FC-SCJ|Pandalidae  
 Pandalus hypsinotus|FC-SCJ 23|Pandalidae  
 Pandalus hypsinotus|AB211295|Pandalidae  
 Pandalus platyceros|FC-SDF12B|Pandalidae  
 Pandalus platyceros|FC-SDF6A|Pandalidae  
 Pandalus stenolepis|FC-SDH165|Pandalidae  
 Pandalus stenolepis|FC-SDH172|Pandalidae  
 Benthoeognema borealis|FC-TRB12A|Benthescymidae  
 Benthoeognema borealis|FC-TRB12B|Benthescymidae  
 Plesionika heterocarpus|FCFOP70-21|Pandalidae  
 Plesionika heterocarpus|FCFOP70-22|Pandalidae  
 Plesionika heterocarpus|FCFOP70-18|Pandalidae  
 Plesionika heterocarpus|FCDOPB093-05|Pandalidae  
 Plesionika heterocarpus|FCDOPB093-04|Pandalidae  
 Plesionika heterocarpus|FCFOP70-20|Pandalidae  
 Plesionika heterocarpus|FCDOPB093-01|Pandalidae  
 Plesionika heterocarpus|FCFOPC047-12|Pandalidae  
 Plesionika heterocarpus|JSDMe29|Pandalidae  
 Plesionika heterocarpus|JSDMe30|Pandalidae  
 Plesionika narval|FCFOPC050-14|Pandalidae  
 Plesionika narval|JSDMe77|Pandalidae  
 Plesionika narval|FCFOPC046-02|Pandalidae  
 Plesionika narval|JSDMe78|Pandalidae  
 Plesionika narval|JSDMe79|Pandalidae  
 Alvinocaris longirostris|AB222050|Alvinocarididae  
 Alvinocaris longirostris|AB222051|Alvinocarididae  
 Alvinocaris muricola|EU031814|Alvinocarididae  
 Opaepele loihi|DQ328829|Alvinocarididae  
 Opaepele loihi|DQ328824|Alvinocarididae  
 Opaepele loihi|DQ328834|Alvinocarididae  
 Opaepele loihi|DQ328830|Alvinocarididae  
 Opaepele loihi|DQ328819|Alvinocarididae  
 Opaepele loihi|DQ328825|Alvinocarididae  
 Opaepele loihi|DQ328836|Alvinocarididae  
 Opaepele loihi|DQ328820|Alvinocarididae  
 Opaepele loihi|DQ328826|Alvinocarididae  
 Opaepele loihi|DQ328837|Alvinocarididae  
 Pontocaris cathanphracta|JSDMe16|Crangonidae  
 Pontocaris cathanphracta|JSDMe15|Crangonidae  
 Pontocaris cathanphracta|JSDMe17|Crangonidae  
 Acanthephyra purpurea|JSDPX63-02|Oplophoridae  
 Acanthephyra purpurea|JSDPX63-03|Oplophoridae  
 Systellaspis braueri|FC-TGB15|Oplophoridae  
 Oplophorus spinosus|JSDPX41-02|Oplophoridae  
 Oplophorus spinosus|FCFOPC052-15|Oplophoridae  
 Oplophorus spinosus|JSDPX41-03|Oplophoridae  
 Oplophorus spinosus|JSDPX41-04|Oplophoridae  
 Oplophorus spinosus|JSDPX41-05|Oplophoridae  
 Systellaspis pellucida|JSDPX42-01|Oplophoridae  
 Systellaspis pellucida|JSDPX42-03|Oplophoridae  
 Acanthephyra pelagica|JSDUKdeep\_37|Oplophoridae  
 Acanthephyra pelagica|AM087915|Oplophoridae  
 Philocheras monocanthus|FCDPHMSM241\_101|Crangonidae
